# Supplementary material for: Global healthcare fairness: We should be sharing more, not less, data
Source: PubMed Central journal article supplement (PMC9931202; doi:10.1371/journal.pdig.0000102), 2022-10-06
Supplement: pdig.0000102.s001.pdf [file pdig.0000102.s001.pdf]

Supplementary Table 1: Open Health Data Re-Identification PubMed Review Results

| PMID     | Title                                                                                                               | Authors                                                                                                                                     | Citation                                                                                                    | First Author  | Journal/Book                        | Publication Year | Create Date | PMCID      | NHMS ID    | DOI                            |
|----------|---------------------------------------------------------------------------------------------------------------------|---------------------------------------------------------------------------------------------------------------------------------------------|-------------------------------------------------------------------------------------------------------------|---------------|-------------------------------------|------------------|-------------|------------|------------|--------------------------------|
| 29991478 | Genomic Privacy                                                                                                     | Schwab AP, Liu HS, Wang J, Park JY                                                                                                          | Clin Chem. 2018 Dec;64(12):1696-1703. doi: 10.1073/cclnchem.2018.289512. Epub 2018 Jul 10.                  | Schwab AP     | Clin Chem                           | 2018             | 2018/07/12  |            |            | 10.1373/jclinchem.2018.289512  |
| 30629502 | Progressive Learning for Person Re-identification with One Example                                                  | Wu Y, Lin Y, Dong X, Yan Y, Bian W, Yang Y                                                                                                  | IEEE Trans Image Process. 2019 Jan 10. doi: 10.1109/TIP.2019.2891895. Online ahead of print.                | Wu Y          | IEEE Trans Image Process            | 2019             | 2019/01/11  |            |            | 10.1109/TIP.2019.2891895       |
| 30972355 | Assessing and Minimizing Re-identification Risk in Research Data Derived from Health Care Records                   | Simon GE, Shortreed SM, Coley RY, Panfili RL, Rossom RC, Watzelberger BE, Sanchez K, Lynch FL                                               | EGEMS (Wash DC). 2019 Mar 29;7(1):6. doi: 10.5334/egems.270.                                                | Simon GE      | EGEMS (Wash DC)                     | 2019             | 2019/04/12  | PMC6450246 |            | 10.5334/egems.270              |
| 33445306 | Enabling realistic health data re-identification risk assessment through adversarial modeling                       | Xia W, Liu Y, Wan Z, Vorobeychik Y, Kartacioglu M, Nyemba S, Clayton EW, Main BA                                                            | J Am Med Inform Assoc. 2021 Mar 18;28(4):744-752. doi: 10.1093/jamia/ocaa327.                               | Xia W         | J Am Med Inform Assoc               | 2021             | 2021/01/15  |            |            | 10.1093/jamia/ocaa327          |
| 32165110 | The risk of re-identification when analyzing electronic health records: a critical appraisal and possible solutions | Hauswaldt J, Demmer L, Heinemann S, Himmell W, Hummers E, Pung J, Schlegelmich F, Drepper J                                                 | Z Evid Fortbild Qual Gesundheitswes. 2019 Dec;149:22-31. doi: 10.1016/j.zefq.2020.01.002. Epub 2020 Mar 10. | Hauswaldt J   | Z Evid Fortbild Qual Gesundheitswes | 2019             | 2020/03/14  |            |            | 10.1016/j.zefq.2020.01.002     |
| 33754988 | Epidemiologic and Genomic Reidentification of Yaws, Liberia                                                         | Timothy JWS, Beale MA, Rogers E, Zaizay Z, Halliday KE, Mubah T, Giddings RK, Walker SL, Thomson NR, Kollie KK, Pullan RL, Marks M          | Emerg Infect Dis. 2021 Apr 27;27(4):1123-1132. doi: 10.3201/eid2704.204442.                                 | Timothy JWS   | Emerg Infect Dis                    | 2021             | 2021/03/23  | PMC8007311 |            | 10.3201/eid2704.204442         |
| 33819836 | The effect of kinship in re-identification attacks against genomic data sharing beacons                             | Ayoz K, Aysen M, Ayday E, Ciolek AE                                                                                                         | Bioinformatics. 2020 Dec 30;36(Suppl_2):i803-i810. doi: 10.1093/bioinformatics/btaa821.                     | Ayoz K        | Bioinformatics                      | 2020             | 2020/12/31  | PMC7773481 |            | 10.1093/bioinformatics/btaa821 |
| 30052749 | Re-identification of individuals in genomic data-sharing beacons via allele inference                               | von Thanen N, Ayday E, Ciolek AE                                                                                                            | Bioinformatics. 2019 Feb 1;35(3):365-371. doi: 10.1093/bioinformatics/bty643.                               | von Thanen N  | Bioinformatics                      | 2019             | 2019/07/28  |            |            | 10.1093/bioinformatics/bty643  |
| 31690260 | European Medicines Agency Policy 0070: an exploratory review of data utility in clinical study reports for          | Farran JM, Nevitt SJ                                                                                                                        | BMC Med Res Methodol. 2019 Nov 5;19(1):204. doi: 10.1186/s12874-019-0836-3.                                 | Farran JM     | BMC Med Res Methodol                | 2019             | 2019/11/07  | PMC6833240 |            | 10.1186/s12874-019-0836-3      |
| 34077454 | Fundamental privacy rights in a pandemic state                                                                      | Carvalho T, Faria P, Antunes L, Moris N                                                                                                     | PLoS One. 2021 Jun 2;16(6):e0252169. doi: 10.1371/journal.pone.0252169. eCollection 2021.                   | Carvalho T    | PLoS One                            | 2021             | 2021/06/02  | PMC8171945 |            | 10.1371/journal.pone.0252169   |
| 33178000 | Unsupervised Few-Shot Feature Learning via Self-Supervised Training                                                 | Ji Z, Zou X, Huang T, Wu S                                                                                                                  | Front Comput Neurosci. 2020 Oct 14;14:83. doi: 10.3389/fncom.2020.00083. eCollection 2020.                  | Ji Z          | Front Comput Neurosci               | 2020             | 2020/11/12  | PMC7992391 |            | 10.3389/fncom.2020.00083       |
| 31922426 | Privacy Risks of Sharing Data from Environmental Health Studies                                                     | Boronow KE, Petrovich LJ, Sweeney L, Yoo JS, Rudel RA, Brown P, Brody JG                                                                    | Environ Health Perspect. 2020 Jan;128(1):17008. doi: 10.1289/EHP4817. Epub 2020 Jan 10.                     | Boronow KE    | Environ Health Perspect             | 2020             | 2020/01/11  | PMC7015543 |            | 10.1289/EHP4817                |
| 30106660 | New and Improved? 21st Century Cures Act Revisions to Certificates of Confidentiality                               | Wolf LE, Beskow LM                                                                                                                          | Am J Law Med. 2018 May;44(2-3):343-358. doi: 10.1177/0098858818789431.                                      | Wolf LE       | Am J Law Med                        | 2018             | 2018/08/15  | PMC6173564 | NHMS898990 | 10.1177/0098858818789431       |
| 30419916 | Federating patient identities: the case of rare diseases                                                            | Maarouf M, Landais P, Messiaen C, Jaulent MC, Choquet R                                                                                     | Orphanet J Rare Dis. 2018 Nov 12;13(1):199. doi: 10.1186/s13023-018-0948-6.                                 | Maarouf M     | Orphanet J Rare Dis                 | 2018             | 2018/11/14  | PMC6233358 |            | 10.1186/s13023-018-0948-6      |
| 31484055 | Pseudonymization for research data collection: is the juice worth the squeeze?                                      | Kohlmeier F, Lautenschlager R, Prasser F                                                                                                    | BMC Med Inform Decis Mak. 2019 Sep 4;19(1):178. doi: 10.1186/s12911-019-0805-x.                             | Kohlmeier F   | BMC Med Inform Decis Mak            | 2019             | 2019/09/06  | PMC6727263 |            | 10.1186/s12911-019-0805-x      |
| 34295512 | Re-identification of individuals from images using spot constellations: a case study in Arctic charr (Salvelinus)   | De Bicki IT, Mittel EA, Kristjánsson BK, Latalano CA, Morrissey MB, Terzic K                                                                | R Soc Open Sci. 2021 Jul 27;18(7):210768. doi: 10.1098/rsos.201768. eCollection 2021 Jul.                   | De Bicki IT   | R Soc Open Sci                      | 2021             | 2021/07/23  | PMC8292754 |            | 10.1098/rsos.201768            |
| 34749033 | Re-identification of Patient Subgroups in Uveal Melanoma                                                            | Nguyen THY, Nguyen T, Nguyen QH, Le DH                                                                                                      | Front Oncol. 2021 Oct 20;11:731548. doi: 10.3389/fonc.2021.731548. eCollection 2021.                        | Nguyen THY    | Front Oncol                         | 2021             | 2021/11/08  | PMC8564479 |            | 10.3389/fonc.2021.731548       |
| 32997875 | Toward the Development of Data Governance Standards for Using Clinical Free-Text Data in Health Resea               | Jones KH, Ford EM, Lee N, Griffiths LJ, Hassan L, Heys S, Squires E, Nenadic G                                                              | J Med Internet Res. 2020 Jun 29;22(6):e16760. doi: 10.2196/16760.                                           | Jones KH      | J Med Internet Res                  | 2020             | 2020/06/20  | PMC7367542 |            | 10.2196/16760                  |
| 22164229 | A systematic review of re-identification attacks on health data                                                     | Ei Emam K, Jonker E, Arbuckle L, Main B                                                                                                     | PLoS One. 2011;6(12):e28071. doi: 10.1371/journal.pone.0028071. Epub 2011 Dec 2.                            | Ei Emam K     | PLoS One                            | 2011             | 2011/12/14  | PMC3229505 |            | 10.1371/journal.pone.0028071   |
| 32162281 | Less than five is less than ideal: replacing the "less than 5 cell size" rule with a risk-based data disclosure     | Wilkinson K, Green C, Nowicki D, Von Schröder C                                                                                             | Can J Public Health. 2020 Oct;111(9):761-765. doi: 10.17269/cjph.1997-020-0303-8. Epub 2020 Mar 11.         | Wilkinson K   | Can J Public Health                 | 2020             | 2020/03/13  | PMC7501321 |            | 10.17269/cjph.1997-020-0303-8  |
| 31713079 | Efficient and effective pruning strategies for health data de-identification                                        | Passer F, Kohlmeier F, Kuhn KA                                                                                                              | BMC Med Inform Decis Mak. 2016 Apr 30;16:49. doi: 10.1186/s12911-016-0287-2.                                | Passer F      | BMC Med Inform Decis Mak            | 2016             | 2016/05/01  | PMC4851781 |            | 10.1186/s12911-016-0287-2      |
| 2652116  | Patient-Centered Outcomes Research in Practice: The CAPICORN Infrastructure                                         | Solomonides A, Goff S, Hynes D, Silverstein JC, Hota B, Trick W, Angulo F, Price R, Sadhu E, Zetisko S, Fischer J, Fumer B, Hamilton A, P   | Stud Health Technol Inform. 2015;216:584-8.                                                                 | Solomonides A | Stud Health Technol Inform          | 2015             | 2015/08/12  |            |            |                                |
| 30687892 | Re-identification Risks in HIPAA Safe Harbor Data: A study of data from one environmental health study              | Sweeney L, Yoo JS, Petrovich L, Boronow KE, Brown P, Brody JG                                                                               | Technol Sci. 2017;2017:082801. Epub 2017 Aug 28.                                                            | Sweeney L     | Technol Sci                         | 2017             | 2019/01/29  | PMC8344041 | NHMS888781 |                                |
| 27141525 | Privacy, Security, and Patient Engagement: The Changing Health Data Governance Landscape                            | Holmes JH                                                                                                                                   | EGEMS (Wash DC). 2016 Mar 31;4(2):1261. doi: 10.5334/egems.2016.02071. Epub 2016 Mar 10.                    | Holmes JH     | EGEMS (Wash DC)                     | 2016             | 2016/05/04  | PMC4877877 |            | 10.5334/egems.2016.02071       |
| 22730452 | De-identification methods for open health data: the case of the Heritage Health Prize claims dataset                | Ei Emam K, Arbuckle L, Koru G, Eze B, Gaudette L, Neri E, Rose S, Howard J, Gluck J                                                         | J Med Internet Res. 2012 Feb 27;14(1):e33. doi: 10.2196/jmir.2001.                                          | Ei Emam K     | J Med Internet Res                  | 2012             | 2012/02/29  | PMC3374547 |            | 10.2196/jmir.2001              |
| 29036461 | Mechanisms to protect the privacy of families when using the transmission disequilibrium test in genome             | Wang M, Ji Z, Wang S, Kim J, Yang H, Jiang X, Chiro-Machado L                                                                               | Bioinformatics. 2017 Dec 1;33(23):3716-3725. doi: 10.1093/bioinformatics/btx470.                            | Wang M        | Bioinformatics                      | 2017             | 2017/10/17  | PMC5860319 |            | 10.1093/bioinformatics/btx470  |
| 34011836 | Reidentification of Protected Health Information: Can the Risk Be Quantified?                                       | Higgins TL                                                                                                                                  | Crit Care Med. 2021 Jun 1;49(6):1003-1006. doi: 10.1097/CCM.0000000000004931.                               | Higgins TL    | Crit Care Med                       | 2021             | 2021/05/20  |            |            | 10.1097/CCM.0000000000004931   |
| 17213047 | Evaluating common de-identification heuristics for personal health information                                      | Ei Emam K, Jabbour S, Sams S, Drouot Y, Power M                                                                                             | J Med Internet Res. 2006 Nov 21;8(4):e428. doi: 10.2196/jmir.8.4.e428.                                      | Ei Emam K     | J Med Internet Res                  | 2006             | 2007/01/11  | PMC1794009 |            | 10.2196/jmir.8.4.e428          |
| 34139910 | Protecting Privacy and Transforming COVID-19 Case Surveillance Datasets for Public Use                              | Lee B, Dupont B, Deputy NP, Duck W, Soroka S, Botticchio L, Silk B, Price J, Sweeney P, Fuld J, Weber JF, Pollock D                         | Public Health Rep. 2021 Sep-Oct;136(5):554-561. doi: 10.1177/0033354211026817. Epub 2021 Jun 17.            | Lee B         | Public Health Rep                   | 2021             | 2021/06/18  | PMC8216038 |            | 10.1177/0033354211026817       |
| 26739310 | Anonymization of geographical distance matrices via Lipschitz embedding                                             | Kiehl M, Schnell R                                                                                                                          | Int J Health Geogr. 2016 Jan 7;15(1):e33. doi: 10.1186/s12942-015-0031-7.                                   | Kiehl M       | Int J Health Geogr                  | 2016             | 2016/01/08  | PMC4704375 |            | 10.1186/s12942-015-0031-7      |
| 32049474 | What does coal mine dust lung disease look like? A radiological review following re-identification in Queer         | McBean R, Tatkovic A, Edwards R, Newbiggin K                                                                                                | J Med Imaging Radiat Oncol. 2020 Apr;64(2):229-235. doi: 10.1111/1754-9485.13007. Epub 2020 Feb 11.         | McBean R      | J Med Imaging Radiat Oncol          | 2020             | 2020/02/13  |            |            | 10.1111/1754-9485.13007        |
| 30202991 | Evaluation of Privacy Risks of Patients' Data in China: Case Study                                                  | Gong M, Wang S, Wang L, Liu G, Wang J, Guo Q, Zheng H, Xia K, Wang C, Hu Z                                                                  | JMIR Med Inform. 2020 Feb 5;8(2):e13046. doi: 10.2196/13046.                                                | Gong M        | JMIR Med Inform                     | 2020             | 2020/02/06  | PMC7055805 |            | 10.2196/13046                  |
| 34711008 | BAMboozle removes genetic variation from human sequence data for open data sharing                                  | Ziegenhain C, Sandberg R                                                                                                                    | Nat Commun. 2021 Oct 28;12(1):6216. doi: 10.1038/s41467-021-26152-8.                                        | Ziegenhain C  | Nat Commun                          | 2021             | 2021/10/29  | PMC8553849 |            | 10.1038/s41467-021-26152-8     |
| 22345446 | How anonymous is 'anonymous'? Some suggestions towards a coherent universal coding system for gen                   | Schmidt H, Callier S                                                                                                                        | J Med Ethics. 2012 May;38(5):304-9. doi: 10.1136/medethics-2011-100181. Epub 2012 Feb 16.                   | Schmidt H     | J Med Ethics                        | 2012             | 2012/02/21  | PMC3390742 | NHMS883296 | 10.1136/medethics-2011-100181  |
| 24485220 | Policy recommendations for addressing privacy challenges associated with cell-based research and inter              | Ogboju U, Bunningham S, Ollenberg A, Calder K, Du L, Ei Emam K, Hyde-Lay R, Issai R, Joly Y, Kerr I, Main B, McDonald M, Penney S, Plat     | BMC Med Ethics. 2014 Feb 3;15:7. doi: 10.1186/1472-6939-15-7.                                               | Ogboju U      | BMC Med Ethics                      | 2014             | 2014/02/04  | PMC3914710 |            | 10.1186/1472-6939-15-7         |
| 2645197  | Cysteine proteases of positive strand RNA viruses and chymotrypsin-like serine proteases. A distinct pro            | Gorbalkina AE, Doncherko AP, Bironov MV, Kozmin EV                                                                                          | FEBS Lett. 1989 Jan 30;243(2):103-14. doi: 10.1016/0014-5793(89)90109-7.                                    | Gorbalkina AE | FEBS Lett                           | 1989             | 1989/01/30  |            |            | 10.1016/0014-5793(89)90109-7   |
| 21190545 | Can you: threats to confidentiality due to the public release of large-scale genetic data sets                      | Wist M                                                                                                                                      | BMC Med Ethics. 2010 Dec 29;11(21):125. doi: 10.1186/1472-6939-11-21.                                       | Wist M        | BMC Med Ethics                      | 2010             | 2010/12/31  | PMC3025040 |            | 10.1186/1472-6939-11-21        |
| 28662347 | Outcome measures for oral health based on clinical assessments and claims data: feasibility evaluation i            | Hummel R, Bhuurs J, van der Gaellen O, van der Sanden W, van der Heijden G                                                                  | BMC Oral Health. 2017 Oct 5;17(1):125. doi: 10.1186/s12903-017-0410-5.                                      | Hummel R      | BMC Oral Health                     | 2017             | 2017/10/07  | PMC5629757 |            | 10.1186/s12903-017-0410-5      |
| 21893927 | Is the biggest security threat to medical information simply a lack of understanding?                               | Williams PA                                                                                                                                 | Stud Health Technol Inform. 2011;168:179-87.                                                                | Williams PA   | Stud Health Technol Inform          | 2011             | 2011/09/07  |            |            |                                |
| 17544262 | A computational model to protect patient data from location-based re-identification                                 | Main B                                                                                                                                      | Artif Intell Med. 2007 Jul;40(3):223-39. doi: 10.1016/j.artmed.2007.04.002. Epub 2007 Jun 1.                | Main B        | Artif Intell Med                    | 2007             | 2007/06/05  |            |            | 10.1016/j.artmed.2007.04.002   |
| 30251219 | Sharing ICU Patient Data Responsibly Under the Society of Critical Care Medicine-European Society of In             | Thoral PJ, Peppercorn JM, Driesner RH, Sijbrands EJJ, Kompans EJO, Kaplan L, Bailey H, Kasecioglu J, Cecconi M, Churpek M, Clement G, et al | Crit Care Med. 2021 Jun 1;49(6):e571-577. doi: 10.1097/CCM.0000000000004916.                                | Thoral PJ     | Crit Care Med                       | 2021             | 2021/02/24  | PMC8132068 |            | 10.1097/CCM.0000000000004916   |
| 26699124 | Utility of linking primary care electronic medical records with Canadian census data to study the determi           | Biro S, Williamson T, Leggett JA, Barber D, Morham R, Moore K, Balanger P, Mosley B, Janssen L                                              | BMC Med Inform Decis Mak. 2016 Mar 11;16:32. doi: 10.1186/s12911-016-0272-9.                                | Biro S        | BMC Med Inform Decis Mak            | 2016             | 2016/03/13  | PMC4788841 |            | 10.1186/s12911-016-0272-9      |

|          |                                                                                                                 |                                                                                                                                        |                                                                                                         |               |                                   |      |            |            |                                  |
|----------|-----------------------------------------------------------------------------------------------------------------|----------------------------------------------------------------------------------------------------------------------------------------|---------------------------------------------------------------------------------------------------------|---------------|-----------------------------------|------|------------|------------|----------------------------------|
| 2430320  | Genomes in the cloud: balancing privacy rights and the public good                                              | Orino-Machado L, Farcas C, Kim J, Wang S, Jiang X.                                                                                     | AMA Jt Summits Transl Sci Proc. 2013 Mar 18;2013:128. eCollection 2013.                                 | Orino-Machado | AMA Jt Summits Transl Sci Proc    | 2013 | 2013/12/05 |            |                                  |
| 34682028 | Preprocessing Pipelines including Block-Matching Convolutional Neural Network for Image Denoising to F          | Pawlicki M, Choraś RS.                                                                                                                 | Entropy (Basel). 2021 Oct 3;23(10):1304. doi: 10.3390/entropy23101304.                                  | Pawlicki M    | Entropy (Basel)                   | 2021 | 2021/10/23 | PMC8534374 | 10.3390/entropy23101304          |
| 23866111 | An analysis of resistance of nosocomial infection pathogens isolated from 13 teaching hospitals in 2011         | Chen HB, Zhao CJ, Wang H, Cao B, Xu XL, Chu YZ, Hu ZD, Zhuo C, Hu BJ, Liu WE, Liao K, Zhang R, Zeng J, Wang Y, Luo YP, Wang ZW, Liu Z. | Zhonghua Nei Ke Za Zhi. 2013 Mar;52(3):203-12.                                                          | Chen HB       | Zhonghua Nei Ke Za Zhi            | 2013 | 2013/07/17 |            |                                  |
| 34737969 | Using Synthetic Data to Replace Linkage Derived Elements: A Case Study                                          | Resnick DM, Cox CS, Mirel LB.                                                                                                          | Health Serv Outcomes Res Methodol. 2021 Feb 3;21:389-406. doi: 10.1007/s10742-021-00241-z.              | Resnick DM    | Health Serv Outcomes Res Methodol | 2021 | 2021/11/05 | PMC8562018 | NHMS1670771                      |
| 20358006 | Anonymization of electronic medical records for validating genome-wide association studies                      | Loukidis G, Kikolaidis-Divani A, Malin B.                                                                                              | Proc Natl Acad Sci U S A. 2010 Apr 27;107(17):9898-903. doi: 10.1073/pnas.0914886107. Epub 2010 Apr 12. | Loukidis G    | Proc Natl Acad Sci U S A          | 2010 | 2010/04/14 | PMC2967915 | 10.1073/pnas.0914886107          |
| 26104741 | Design and implementation of a privacy preserving electronic health record linkage tool in Chicago              | Kho AN, Cashy JP, Jackson KL, Pah AR, Goel S, Boehnke CV, Humphries JE, Komrinos SD, Hota BN, Sims SA, Malin BA, French DD, Walunas J. | J Am Med Inform Assoc. 2015 Sep;22(5):1072-80. doi: 10.1093/jamia/ocv038. Epub 2015 Jun 23.             | Kho AN        | J Am Med Inform Assoc             | 2015 | 2015/06/25 | PMC3009921 | 10.1093/jamia/ocv038             |
| 32974512 | Application of whole genome sequencing to query a potential outbreak of Elizabethkingia anophelis in Ori        | McTaggart LR, Stapleton PJ, Eshaghi A, Soares D, Brisse S, Patel SN, Kus JV.                                                           | Access Microbiol. 2019 Apr 24;1(2):e000017. doi: 10.1099/acmi.0.000017. eCollection 2019.               | McTaggart LR  | Access Microbiol                  | 2019 | 2020/09/25 | PMC7470347 | 10.1099/acmi.0.000017            |
| 23645033 | Spread of extensively resistant VM-2-positive ST235 Pseudomonas aeruginosa in Belarus, Kazakhstan, a            | Edelestein MV, Skleeneva EN, Shevchenko OV, D'souza JW, Tapalski DV, Azarov IS, Sukhoroukova MV, Pavukov RA, Kozlov RS, Tolaman MA, Wl | Lancet Infect Dis. 2013 Oct;13(10):867-76. doi: 10.1016/S1473-3099(13)70168-3. Epub 2013 Jul 9.         | Edelestein MV | Lancet Infect Dis                 | 2013 | 2013/07/13 |            | 10.1016/S1473-3099(13)70168-3    |
| 25361833 | Banana infecting fungus, Fusarium musae, is also an opportunistic human pathogen: are bananas potentl           | Triest D, Stubbe D, De Cremer K, Péterá D, Delarndi M, Hendrickx M.                                                                    | Mycologia. 2015 Jan-Feb;107(1):46-53. doi: 10.3852/14-174. Epub 2014 Oct 31.                            | Triest D      | Mycologia                         | 2015 | 2014/11/02 |            | 10.3852/14-174                   |
| 20467081 | Titanic's unknown child: the critical role of the mitochondrial DNA coding region in a re-identification effort | Just RS, Lovelle OM, Moto JE, Meriwether DA, Woodward SR, Matheson C, Creed J, McGrath SE, Sturk-Andreaggi K, Coble MD, Irwin JA, R    | Forensic Sci Int Genet. 2011 Jun;5(2):231-5. doi: 10.1016/j.fsigen.2010.01.012. Epub 2010 Apr 2.        | Just RS       | Forensic Sci Int Genet            | 2011 | 2010/05/12 |            | 10.1016/j.fsigen.2010.01.012     |
| 10482033 | Microbiological characterization and clinical significance of Corynebacterium amycolatum strains                | Esteban J, Nieto E, Calvo R, Fernández-Robals R, Valero-Guillén PL, Soriano F.                                                         | Eur J Clin Microbiol Infect Dis. 1999 Jul;18(7):518-21. doi: 10.1007/s109860050336.                     | Esteban J     | Eur J Clin Microbiol Infect Dis   | 1999 | 1999/09/11 |            | 10.1007/s109860050336            |
| 8567907  | Fatal cerebral mycoses caused by the ascomycete Chaetomium strumarum                                            | Abbott SP, Sigler L, McAlear R, McGough DA, Rinaldi MJ, Mzali G.                                                                       | J Clin Microbiol. 1995 Oct;33(10):2692-8. doi: 10.1128/jcm.33.10.2692-2698.1995.                        | Abbott SP     | J Clin Microbiol                  | 1995 | 1995/10/01 | PMC228557  | 10.1128/jcm.33.10.2692-2698.1995 |
| 24778614 | Sharing privacy-sensitive access to neuroimaging and genetics data: a review and preliminary validation         | Sarwate AD, Pils SM, Turner JA, Arbabshirani MR, Calhoun VD.                                                                           | Front Neuroinform. 2014 Apr 7;8:35. doi: 10.3389/fninf.2014.00035. eCollection 2014.                    | Sarwate AD    | Front Neuroinform                 | 2014 | 2014/04/30 | PMC3985022 | 10.3389/fninf.2014.00035         |
| 27187300 | Don't Take It Personal: European Union Legal Aspects of Procuring and Protecting Environmental Exposu           | Bovenberg JA, de Hoogh K, Knoppers BM, Hveem K, Hansell AL.                                                                            | Bioreserv Biobank. 2016 Jun;14(3):217-23. doi: 10.1089/bio.2016.0007. Epub 2016 May 17.                 | Bovenberg JA  | Bioreserv Biobank                 | 2016 | 2016/05/18 |            | 10.1089/bio.2016.0007            |
| 172897   | Growth and differentiation in culture of leukemic leukocytes from a patient with acute myelogenous leukei       | Gallagher RE, Salahuddin SZ, Hall WT, McCredie KB, Gallo RC.                                                                           | Proc Natl Acad Sci U S A. 1975 Oct;72(10):4137-41. doi: 10.1073/pnas.72.10.4137.                        | Gallagher RE  | Proc Natl Acad Sci U S A          | 1975 | 1975/10/01 | PMC433154  | 10.1073/pnas.72.10.4137          |
| 19642061 | The clinical spectrum of Exophiala jeikei, with a case report and in vitro antifungal susceptibility of th      | Badali H, Najafzadeh MJ, van Estroock M, van den Enden E, Tarazooie B, Meis JF, de Hoog GS.                                            | Med Mycol. 2010 Mar;48(2):318-27. doi: 10.1080/13697890903148353.                                       | Badali H      | Med Mycol                         | 2010 | 2009/07/31 |            | 10.1080/13697890903148353        |
| 22231474 | Chemical ecology of astigmatid mites LXXXVII. S-(+)-isopropenone: re-identification of the alarm pherom         | Maruno G, Mori N, Kawahara Y.                                                                                                          | J Chem Ecol. 2012 Jan;38(1):36-41. doi: 10.1007/s10886-012-0059-0. Epub 2012 Jan 10.                    | Maruno G      | J Chem Ecol                       | 2012 | 2012/01/11 |            | 10.1007/s10886-012-0059-0        |
| 17156451 | An unsupervised classification method for inferring original case locations from low-resolution disease m       | Brownstein JS, Cassa CA, Kohane IS, Mandl KD.                                                                                          | Int J Health Geogr. 2006 Dec 8;5:56. doi: 10.1186/1476-072X-5-56.                                       | Brownstein JS | Int J Health Geogr                | 2006 | 2006/12/13 | PMC1702538 | 10.1186/1476-072X-5-56           |
| 9237362  | Applications of consensus polymerase chain reaction with subsequent electrophoretic distinction of ampI         | Krause G, Oduroo F, Kaitstein A, Pust T, Pachmann K, Gerzer R.                                                                         | Electrophoresis. 1997 Jun;18(7):1088-102. doi: 10.1002/elpa.1150180712.                                 | Krause G      | Electrophoresis                   | 1997 | 1997/06/01 |            | 10.1002/elpa.1150180712          |
| 11329923 | Confidentiality within the scope of secondary data research—approaches to a solution of the problem of c        | hile P, Krippenweis J, Schubert I.                                                                                                     | Gesundheitswesen. 2001 Mar;63 Suppl 1:56-12. doi: 10.1055/s-2001-12105.                                 | hile P        | Gesundheitswesen                  | 2001 | 2001/05/02 |            | 10.1055/s-2001-12105             |
| 19691645 | Period analysis of cancer patient survival in datasets from which the month of diagnosis has been remov         | Brenner H, Arndt V.                                                                                                                    | Eur J Cancer. 2005 Feb;41(3):438-44. doi: 10.1016/j.ejca.2004.11.018.                                   | Brenner H     | Eur J Cancer                      | 2005 | 2005/02/05 |            | 10.1016/j.ejca.2004.11.018       |
| 16916188 | Prevention strategy for post dural puncture headache                                                            | Gunaydin B, Karaca G.                                                                                                                  | Acta Anaesthesiol Belg. 2006;57(2):163-5.                                                               | Gunaydin B    | Acta Anaesthesiol Belg            | 2006 | 2006/08/19 |            |                                  |
| 16165264 | [Mammary augmentation surgery and psychology. Clinical reports]                                                 | Godfrey M, Flageul G.                                                                                                                  | Ann Chir Plast Esthet. 2005 Oct;50(5):371-7. doi: 10.1016/j.anplas.2005.07.007. Epub 2005 Sep 13.       | Godfrey M     | Ann Chir Plast Esthet             | 2005 | 2005/09/17 |            | 10.1016/j.anplas.2005.07.007     |
