# Supplementary material for: Global healthcare fairness: We should be sharing more, not less, data
Source: PubMed Central journal article supplement (PMC9931202; doi:10.1371/journal.pdig.0000102), 2022-10-06
Supplement: pdig.0000102.s002.pdf [file pdig.0000102.s002.pdf]

Supplementary Table 2: Coded De-Anonymization and Re-Identification Stories

| stories_id | publish_date   | title                                                                                         | url                                                                                                                                                                                                                                                                                                       | language | ap_syndicated | themes                 | media_id | media_name                          | media_url                                                                                                         | Code        | Personal Case? |
|------------|----------------|-----------------------------------------------------------------------------------------------|-----------------------------------------------------------------------------------------------------------------------------------------------------------------------------------------------------------------------------------------------------------------------------------------------------------|----------|---------------|------------------------|----------|-------------------------------------|-------------------------------------------------------------------------------------------------------------------|-------------|----------------|
| 134649876  | 7/23/19 15:20  | 'Anonymous' data might not be so anonymous, study shows                                       | <a href="https://www.nbcnews.com/tech/tech-news/anonymous-data-might-not-be-so-anonymous-study-shows-n10331117cid-public-ns_20190723">https://www.nbcnews.com/tech/tech-news/anonymous-data-might-not-be-so-anonymous-study-shows-n10331117cid-public-ns_20190723</a>                                     | en       | FALSE         |                        | 34683    | NBC Breaking News                   | <a href="http://www.breakingnews.com/spider">http://www.breakingnews.com/spider</a>                               | Research    | 0              |
| 1557562455 | 3/24/20 10:24  | 'Track and trace' is key to containing COVID-19: how privacy can be protected                 | <a href="https://theconversation.com/track-and-trace-is-key-to-containing-covid-19-how-privacy-can-be-protected-131490">https://theconversation.com/track-and-trace-is-key-to-containing-covid-19-how-privacy-can-be-protected-131490</a>                                                                 | en       | FALSE         |                        | 54346    | Conversation                        | <a href="https://theconversation.com/us">https://theconversation.com/us</a>                                       | Theoretical | 0              |
| 1997283044 | 7/21/21 17:20  | A Catholic priest resigned after a news site used cell phone location data to track his phone | <a href="https://hottair.com/john-s-2-2021-07-21/a-catholic-priest-resigned-after-a-news-site-used-cell-phone-location-data-to-track-his-phone-n100842">https://hottair.com/john-s-2-2021-07-21/a-catholic-priest-resigned-after-a-news-site-used-cell-phone-location-data-to-track-his-phone-n100842</a> | en       | FALSE         | christians and christa | 117      | Hot Air                             | <a href="http://hottair.com">http://hottair.com</a>                                                               | Case        | 1              |
| 102221826  | 10/12/18 15:38 | A DNA database with 2% of the population can be used to find almost anyone                    | <a href="https://w.com/142265/public-dna-databases-will-soon-be-able-to-find-almost-anyone/">https://w.com/142265/public-dna-databases-will-soon-be-able-to-find-almost-anyone/</a>                                                                                                                       | en       | FALSE         |                        | 67264    | Quartz                              | <a href="http://w.com/142265/">http://w.com/142265/</a>                                                           | Theoretical | 0              |
| 2025759014 | 8/25/21 16:16  | A secret bias in mortgage-approval algorithms is denying minority borrowers                   | <a href="https://www.ocregister.com/2021/08/25/a-secret-bias-in-mortgage-approval-algorithms-is-denying-minority-borrowers/">https://www.ocregister.com/2021/08/25/a-secret-bias-in-mortgage-approval-algorithms-is-denying-minority-borrowers/</a>                                                       | en       | TRUE          | finances, housing      | 25       | Orange County Register              | <a href="http://www.ocregister.com/">http://www.ocregister.com/</a>                                               | Theoretical | 0              |
| 2025754728 | 8/25/21 16:16  | A secret bias in mortgage-approval algorithms is denying minority borrowers                   | <a href="https://www.dailybulletin.com/2021/08/25/a-secret-bias-in-mortgage-approval-algorithms-is-denying-minority-borrowers/">https://www.dailybulletin.com/2021/08/25/a-secret-bias-in-mortgage-approval-algorithms-is-denying-minority-borrowers/</a>                                                 | en       | TRUE          | finances, housing      | 652989   | City News - United States (Pomona)  | <a href="http://www.dailybulletin.com/pomona/">http://www.dailybulletin.com/pomona/</a>                           | Theoretical | 0              |
| 2025755747 | 8/25/21 16:16  | A secret bias in mortgage-approval algorithms is denying minority borrowers                   | <a href="https://www.eastbaytimes.com/2021/08/25/a-secret-bias-in-mortgage-approval-algorithms-is-denying-minority-borrowers/">https://www.eastbaytimes.com/2021/08/25/a-secret-bias-in-mortgage-approval-algorithms-is-denying-minority-borrowers/</a>                                                   | en       | TRUE          | finances, housing      | 659164   | Berkeley Voice                      | <a href="http://www.insidebayarea.com/Berkeley/">http://www.insidebayarea.com/Berkeley/</a>                       | Theoretical | 0              |
| 2025755038 | 8/25/21 16:16  | A secret bias in mortgage-approval algorithms is denying minority borrowers                   | <a href="https://www.dailynews.com/2021/08/25/a-secret-bias-in-mortgage-approval-algorithms-is-denying-minority-borrowers/">https://www.dailynews.com/2021/08/25/a-secret-bias-in-mortgage-approval-algorithms-is-denying-minority-borrowers/</a>                                                         | en       | TRUE          | finances, housing      | 24901    | Bleacher Report                     | <a href="http://bleacherreport.com">http://bleacherreport.com</a>                                                 | Theoretical | 0              |
| 2025773536 | 8/25/21 16:16  | A secret bias in mortgage-approval algorithms is denying minority borrowers                   | <a href="https://www.dailybulletin.com/2021/08/25/a-secret-bias-in-mortgage-approval-algorithms-is-denying-minority-borrowers/">https://www.dailybulletin.com/2021/08/25/a-secret-bias-in-mortgage-approval-algorithms-is-denying-minority-borrowers/</a>                                                 | en       | TRUE          | finances, housing      | 652990   | City News - United States (Upland)  | <a href="http://www.dailybulletin.com/upland/">http://www.dailybulletin.com/upland/</a>                           | Theoretical | 0              |
| 2025771985 | 8/25/21 16:16  | A secret bias in mortgage-approval algorithms is denying minority borrowers                   | <a href="https://www.whittierdailynews.com/2021/08/25/a-secret-bias-in-mortgage-approval-algorithms-is-denying-minority-borrowers/">https://www.whittierdailynews.com/2021/08/25/a-secret-bias-in-mortgage-approval-algorithms-is-denying-minority-borrowers/</a>                                         | en       | TRUE          | finances, housing      | 28067    | Whittier Daily News                 | <a href="http://www.whittierdailynews.com/">http://www.whittierdailynews.com/</a>                                 | Theoretical | 0              |
| 2025770949 | 8/25/21 16:16  | A secret bias in mortgage-approval algorithms is denying minority borrowers                   | <a href="https://www.redlandsdailyfacts.com/2021/08/25/a-secret-bias-in-mortgage-approval-algorithms-is-denying-minority-borrowers/">https://www.redlandsdailyfacts.com/2021/08/25/a-secret-bias-in-mortgage-approval-algorithms-is-denying-minority-borrowers/</a>                                       | en       | TRUE          | finances, housing      | 27978    | Redlands Daily Facts                | <a href="http://www.redlandsdailyfacts.com/">http://www.redlandsdailyfacts.com/</a>                               | Theoretical | 0              |
| 2025770957 | 8/25/21 16:16  | A secret bias in mortgage-approval algorithms is denying minority borrowers                   | <a href="https://www.syrtribune.com/2021/08/25/a-secret-bias-in-mortgage-approval-algorithms-is-denying-minority-borrowers/">https://www.syrtribune.com/2021/08/25/a-secret-bias-in-mortgage-approval-algorithms-is-denying-minority-borrowers/</a>                                                       | en       | TRUE          | finances, housing      | 28066    | SGV Tribune.com                     | <a href="http://www.syrtribune.com/">http://www.syrtribune.com/</a>                                               | Theoretical | 0              |
| 2025770548 | 8/25/21 16:16  | A secret bias in mortgage-approval algorithms is denying minority borrowers                   | <a href="https://www.presstelegram.com/2021/08/25/a-secret-bias-in-mortgage-approval-algorithms-is-denying-minority-borrowers/">https://www.presstelegram.com/2021/08/25/a-secret-bias-in-mortgage-approval-algorithms-is-denying-minority-borrowers/</a>                                                 | en       | TRUE          | finances, housing      | 27911    | Press-Telegram                      | <a href="http://www.presstelegram.com/">http://www.presstelegram.com/</a>                                         | Theoretical | 0              |
| 2025768864 | 8/25/21 16:16  | A secret bias in mortgage-approval algorithms is denying minority borrowers                   | <a href="https://www.pe.com/2021/08/25/a-secret-bias-in-mortgage-approval-algorithms-is-denying-minority-borrowers/">https://www.pe.com/2021/08/25/a-secret-bias-in-mortgage-approval-algorithms-is-denying-minority-borrowers/</a>                                                                       | en       | TRUE          | finances, housing      | 63       | The Press-Enterprise                | <a href="http://www.pe.com/">http://www.pe.com/</a>                                                               | Theoretical | 0              |
| 2025768141 | 8/25/21 16:16  | A secret bias in mortgage-approval algorithms is denying minority borrowers                   | <a href="https://www.pasadenastarnews.com/2021/08/25/a-secret-bias-in-mortgage-approval-algorithms-is-denying-minority-borrowers/">https://www.pasadenastarnews.com/2021/08/25/a-secret-bias-in-mortgage-approval-algorithms-is-denying-minority-borrowers/</a>                                           | en       | TRUE          | finances, housing      | 27963    | Pasadena Star-News                  | <a href="http://www.pasadenastarnews.com/">http://www.pasadenastarnews.com/</a>                                   | Theoretical | 0              |
| 2025760535 | 8/25/21 16:16  | A secret bias in mortgage-approval algorithms is denying minority borrowers                   | <a href="https://www.sbsun.com/2021/08/25/a-secret-bias-in-mortgage-approval-algorithms-is-denying-minority-borrowers/">https://www.sbsun.com/2021/08/25/a-secret-bias-in-mortgage-approval-algorithms-is-denying-minority-borrowers/</a>                                                                 | en       | TRUE          | finances, housing      | 27992    | San Bernardino County Sun           | <a href="http://www.sbsun.com/">http://www.sbsun.com/</a>                                                         | Theoretical | 0              |
| 2025773253 | 8/25/21 16:16  | A secret bias in mortgage-approval algorithms is denying minority borrowers                   | <a href="https://www.dailybreeze.com/2021/08/25/a-secret-bias-in-mortgage-approval-algorithms-is-denying-minority-borrowers/">https://www.dailybreeze.com/2021/08/25/a-secret-bias-in-mortgage-approval-algorithms-is-denying-minority-borrowers/</a>                                                     | en       | TRUE          | finances, housing      | 28048    | The Daily Breeze                    | <a href="http://www.dailybreeze.com/">http://www.dailybreeze.com/</a>                                             | Theoretical | 0              |
| 2025768137 | 8/25/21 16:16  | A secret bias in mortgage-approval algorithms is denying minority borrowers                   | <a href="https://www.eastbaytimes.com/2021/08/25/a-secret-bias-in-mortgage-approval-algorithms-is-denying-minority-borrowers/">https://www.eastbaytimes.com/2021/08/25/a-secret-bias-in-mortgage-approval-algorithms-is-denying-minority-borrowers/</a>                                                   | en       | TRUE          | finances, housing      | 659204   | Concord Transcript                  | <a href="http://www.contractimes.com/concord/">http://www.contractimes.com/concord/</a>                           | Theoretical | 0              |
| 2025767918 | 8/25/21 16:16  | A secret bias in mortgage-approval algorithms is denying minority borrowers                   | <a href="https://www.mercurynews.com/2021/08/25/a-secret-bias-in-mortgage-approval-algorithms-is-denying-minority-borrowers/">https://www.mercurynews.com/2021/08/25/a-secret-bias-in-mortgage-approval-algorithms-is-denying-minority-borrowers/</a>                                                     | en       | TRUE          | finances, housing      | 659244   | Fremont Bulletin                    | <a href="http://www.mercurynews.com/fremont/">http://www.mercurynews.com/fremont/</a>                             | Theoretical | 0              |
| 2025767078 | 8/25/21 16:16  | A secret bias in mortgage-approval algorithms is denying minority borrowers                   | <a href="https://www.ocregister.com/2021/08/25/a-secret-bias-in-mortgage-approval-algorithms-is-denying-minority-borrowers/">https://www.ocregister.com/2021/08/25/a-secret-bias-in-mortgage-approval-algorithms-is-denying-minority-borrowers/</a>                                                       | en       | TRUE          | finances, housing      | 659381   | Coast Magazine                      | <a href="http://www.coastmagazine.com/">http://www.coastmagazine.com/</a>                                         | Theoretical | 0              |
| 2025764690 | 8/25/21 16:16  | A secret bias in mortgage-approval algorithms is denying minority borrowers                   | <a href="https://www.dailybulletin.com/2021/08/25/a-secret-bias-in-mortgage-approval-algorithms-is-denying-minority-borrowers/">https://www.dailybulletin.com/2021/08/25/a-secret-bias-in-mortgage-approval-algorithms-is-denying-minority-borrowers/</a>                                                 | en       | TRUE          | finances, housing      | 652988   | City News - United States (Ontario) | <a href="http://www.dailybulletin.com/ontario/">http://www.dailybulletin.com/ontario/</a>                         | Theoretical | 0              |
| 2025763009 | 8/25/21 16:16  | A secret bias in mortgage-approval algorithms is denying minority borrowers                   | <a href="https://www.mercurynews.com/2021/08/25/a-secret-bias-in-mortgage-approval-algorithms-is-denying-minority-borrowers/">https://www.mercurynews.com/2021/08/25/a-secret-bias-in-mortgage-approval-algorithms-is-denying-minority-borrowers/</a>                                                     | en       | TRUE          | finances, housing      | 659497   | Willow Glen Resident                | <a href="http://www.mercurynews.com/willow-glen/">http://www.mercurynews.com/willow-glen/</a>                     | Theoretical | 0              |
| 2025810507 | 8/25/21 16:16  | A secret bias in mortgage-approval algorithms is denying minority borrowers                   | <a href="https://www.dailynews.com/2021/08/25/a-secret-bias-in-mortgage-approval-algorithms-is-denying-minority-borrowers/">https://www.dailynews.com/2021/08/25/a-secret-bias-in-mortgage-approval-algorithms-is-denying-minority-borrowers/</a>                                                         | en       | TRUE          | finances, housing      | 74       | Los Angeles Daily News              | <a href="http://www.dailynews.com/">http://www.dailynews.com/</a>                                                 | Theoretical | 0              |
| 2025791685 | 8/25/21 16:16  | A secret bias in mortgage-approval algorithms is denying minority borrowers                   | <a href="https://www.mercurynews.com/2021/08/25/a-secret-bias-in-mortgage-approval-algorithms-is-denying-minority-borrowers/">https://www.mercurynews.com/2021/08/25/a-secret-bias-in-mortgage-approval-algorithms-is-denying-minority-borrowers/</a>                                                     | en       | TRUE          | finances, housing      | 659491   | Almaden Resident                    | <a href="http://www.mercurynews.com/almaden/">http://www.mercurynews.com/almaden/</a>                             | Theoretical | 0              |
| 2025814611 | 8/25/21 16:16  | A secret bias in mortgage-approval algorithms is denying minority borrowers                   | <a href="https://www.eastbaytimes.com/2021/08/25/a-secret-bias-in-mortgage-approval-algorithms-is-denying-minority-borrowers/">https://www.eastbaytimes.com/2021/08/25/a-secret-bias-in-mortgage-approval-algorithms-is-denying-minority-borrowers/</a>                                                   | en       | TRUE          | finances, housing      | 66       | Contra Costa Times                  | <a href="http://www.contracostatimes.com/">http://www.contracostatimes.com/</a>                                   | Theoretical | 0              |
| 2025762627 | 8/25/21 16:16  | A secret bias in mortgage-approval algorithms is denying minority borrowers                   | <a href="https://www.mercurynews.com/2021/08/25/a-secret-bias-in-mortgage-approval-algorithms-is-denying-minority-borrowers/">https://www.mercurynews.com/2021/08/25/a-secret-bias-in-mortgage-approval-algorithms-is-denying-minority-borrowers/</a>                                                     | en       | TRUE          | finances, housing      | 659505   | San Mateo County Times              | <a href="http://www.mercurynews.com/san-mateo-county-times">http://www.mercurynews.com/san-mateo-county-times</a> | Theoretical | 0              |
| 2026649172 | 8/26/21 9:19   | A secret bias in mortgage-approval algorithms is denying minority borrowers                   | <a href="https://www.ocregister.com/2021/08/25/a-secret-bias-in-mortgage-approval-algorithms-is-denying-minority-borrowers">https://www.ocregister.com/2021/08/25/a-secret-bias-in-mortgage-approval-algorithms-is-denying-minority-borrowers</a>                                                         | en       | TRUE          | finances, housing      | 66346    | lagunajournal.com                   | <a href="http://www.lagunajournal.com/spider">http://www.lagunajournal.com/spider</a>                             | Theoretical | 0              |
| 2025819250 | 8/25/21 16:16  | A secret bias in mortgage-approval algorithms is denying minority borrowers                   | <a href="https://www.eastbaytimes.com/2021/08/25/a-secret-bias-in-mortgage-approval-algorithms-is-denying-minority-borrowers/">https://www.eastbaytimes.com/2021/08/25/a-secret-bias-in-mortgage-approval-algorithms-is-denying-minority-borrowers/</a>                                                   | en       | TRUE          | finances, housing      | 659390   | Oakley News                         | <a href="http://www.contracostatimes.com/oakley/">http://www.contracostatimes.com/oakley/</a>                     | Theoretical | 0              |
| 2025838872 | 8/25/21 16:16  | A secret bias in mortgage-approval algorithms is denying minority borrowers                   | <a href="https://www.mercurynews.com/2021/08/25/a-secret-bias-in-mortgage-approval-algorithms-is-denying-minority-borrowers/">https://www.mercurynews.com/2021/08/25/a-secret-bias-in-mortgage-approval-algorithms-is-denying-minority-borrowers/</a>                                                     | en       | TRUE          | finances, housing      | 35       | San Jose Mercury News               | <a href="http://www.mercurynews.com/">http://www.mercurynews.com/</a>                                             | Theoretical | 0              |
| 156099658  | 3/27/20 7:38   | A webcomic explainer on how the census deals with digital privacy                             | <a href="https://beingboing.net/2020/03/27/a-webcomic-explainer-on-how-th.html">https://beingboing.net/2020/03/27/a-webcomic-explainer-on-how-th.html</a>                                                                                                                                                 | en       | FALSE         |                        | 663527   | San Antonio News                    | <a href="http://sanantonionews.com/">http://sanantonionews.com/</a>                                               | Theoretical | 0              |
| 1629438332 | 6/9/20 20:00   | ACLU wants LA to put the brakes on scooter tracking program                                   | <a href="https://www.ocregister.com/2020/06/08/acLU-wants-la-to-put-the-brakes-on-scooter-tracking-program/">https://www.ocregister.com/2020/06/08/acLU-wants-la-to-put-the-brakes-on-scooter-tracking-program/</a>                                                                                       | en       | FALSE         |                        | 25       | Orange County Register              | <a href="http://www.ocregister.com/">http://www.ocregister.com/</a>                                               | Theoretical | 0              |
| 1629438980 | 6/9/20 20:00   | ACLU wants LA to put the brakes on scooter tracking program                                   | <a href="https://www.presstelegram.com/2020/06/08/acLU-wants-la-to-put-the-brakes-on-scooter-tracking-program/">https://www.presstelegram.com/2020/06/08/acLU-wants-la-to-put-the-brakes-on-scooter-tracking-program/</a>                                                                                 | en       | FALSE         |                        | 27911    | Press-Telegram                      | <a href="http://www.presstelegram.com/">http://www.presstelegram.com/</a>                                         | Theoretical | 0              |
| 1629441345 | 6/9/20 20:00   | ACLU wants LA to put the brakes on scooter tracking program                                   | <a href="https://www.dailybulletin.com/2020/06/08/acLU-wants-la-to-put-the-brakes-on-scooter-tracking-program/">https://www.dailybulletin.com/2020/06/08/acLU-wants-la-to-put-the-brakes-on-scooter-tracking-program/</a>                                                                                 | en       | FALSE         |                        | 652990   | City News - United States (Upland)  | <a href="http://www.dailybulletin.com/upland/">http://www.dailybulletin.com/upland/</a>                           | Theoretical | 0              |
| 1629441601 | 6/9/20 20:00   | ACLU wants LA to put the brakes on scooter tracking program                                   | <a href="https://www.dailynews.com/2020/06/08/acLU-wants-la-to-put-the-brakes-on-scooter-tracking-program/">https://www.dailynews.com/2020/06/08/acLU-wants-la-to-put-the-brakes-on-scooter-tracking-program/</a>                                                                                         | en       | FALSE         |                        | 24901    | Bleacher Report                     | <a href="http://bleacherreport.com">http://bleacherreport.com</a>                                                 | Theoretical | 0              |
| 1629441401 | 6/9/20 20:00   | ACLU wants LA to put the brakes on scooter tracking program                                   | <a href="https://www.pasadenastarnews.com/2020/06/08/acLU-wants-la-to-put-the-brakes-on-scooter-tracking-program/">https://www.pasadenastarnews.com/2020/06/08/acLU-wants-la-to-put-the-brakes-on-scooter-tracking-program/</a>                                                                           | en       | FALSE         |                        | 27963    | Pasadena Star-News                  | <a href="http://www.pasadenastarnews.com/">http://www.pasadenastarnews.com/</a>                                   | Theoretical | 0              |
| 1629443047 | 6/9/20 20:00   | ACLU wants LA to put the brakes on scooter tracking program                                   | <a href="https://www.dailybulletin.com/2020/06/08/acLU-wants-la-to-put-the-brakes-on-scooter-tracking-program/">https://www.dailybulletin.com/2020/06/08/acLU-wants-la-to-put-the-brakes-on-scooter-tracking-program/</a>                                                                                 | en       | FALSE         |                        | 652988   | City News - United States (Ontario) | <a href="http://www.dailybulletin.com/ontario/">http://www.dailybulletin.com/ontario/</a>                         | Theoretical | 0              |
| 1629443632 | 6/9/20 20:00   | ACLU wants LA to put the brakes on scooter tracking program                                   | <a href="https://www.syrtribune.com/2020/06/08/acLU-wants-la-to-put-the-brakes-on-scooter-tracking-program/">https://www.syrtribune.com/2020/06/08/acLU-wants-la-to-put-the-brakes-on-scooter-tracking-program/</a>                                                                                       | en       | FALSE         |                        | 28066    | SGV Tribune.com                     | <a href="http://www.syrtribune.com/">http://www.syrtribune.com/</a>                                               | Theoretical | 0              |

|            |                |                                                                                               |                                                                                                                                                                                                                                                                                                 |    |       |                         |        |                                                                                   |                                                                                                   |             |   |
|------------|----------------|-----------------------------------------------------------------------------------------------|-------------------------------------------------------------------------------------------------------------------------------------------------------------------------------------------------------------------------------------------------------------------------------------------------|----|-------|-------------------------|--------|-----------------------------------------------------------------------------------|---------------------------------------------------------------------------------------------------|-------------|---|
| 162944727  | 6/8/20 20:00   | ACLU wants LA to put the brakes on scooter tracking program                                   | <a href="https://www.whittierdailynews.com/2020/06/08/acclu-wants-la-to-put-the-brakes-on-scooter-tracking-program/">https://www.whittierdailynews.com/2020/06/08/acclu-wants-la-to-put-the-brakes-on-scooter-tracking-program/</a>                                                             | en | FALSE |                         | 28067  | Whittier Daily News                                                               | <a href="http://www.whittierdailynews.com/">http://www.whittierdailynews.com/</a>                 | Theoretical | 0 |
| 162944950  | 6/8/20 20:00   | ACLU wants LA to put the brakes on scooter tracking program                                   | <a href="https://www.dailybulletin.com/2020/06/08/acclu-wants-la-to-put-the-brakes-on-scooter-tracking-program/">https://www.dailybulletin.com/2020/06/08/acclu-wants-la-to-put-the-brakes-on-scooter-tracking-program/</a>                                                                     | en | FALSE |                         | 652989 | City News - United States (Pomona)                                                | <a href="http://www.dailybulletin.com/pomona/">http://www.dailybulletin.com/pomona/</a>           | Theoretical | 0 |
| 162944920  | 6/8/20 20:00   | ACLU wants LA to put the brakes on scooter tracking program                                   | <a href="https://www.dailybreeze.com/2020/06/08/acclu-wants-la-to-put-the-brakes-on-scooter-tracking-program/">https://www.dailybreeze.com/2020/06/08/acclu-wants-la-to-put-the-brakes-on-scooter-tracking-program/</a>                                                                         | en | FALSE |                         | 28048  | The Daily Breeze                                                                  | <a href="http://www.dailybreeze.com/">http://www.dailybreeze.com/</a>                             | Theoretical | 0 |
| 162944924  | 6/8/20 20:00   | ACLU wants LA to put the brakes on scooter tracking program                                   | <a href="https://www.dailybulletin.com/2020/06/08/acclu-wants-la-to-put-the-brakes-on-scooter-tracking-program/">https://www.dailybulletin.com/2020/06/08/acclu-wants-la-to-put-the-brakes-on-scooter-tracking-program/</a>                                                                     | en | FALSE |                         | 27951  | Daily Bulletin.com                                                                | <a href="http://www.dailybulletin.com/">http://www.dailybulletin.com/</a>                         | Theoretical | 0 |
| 162944873  | 6/8/20 20:00   | ACLU wants LA to put the brakes on scooter tracking program                                   | <a href="https://www.dailynews.com/2020/06/08/acclu-wants-la-to-put-the-brakes-on-scooter-tracking-program/">https://www.dailynews.com/2020/06/08/acclu-wants-la-to-put-the-brakes-on-scooter-tracking-program/</a>                                                                             | en | FALSE |                         | 74     | Los Angeles Daily News                                                            | <a href="http://www.dailynews.com/">http://www.dailynews.com/</a>                                 | Theoretical | 0 |
| 139359317  | 2/16/19 0:00   | After you spit into a tube for a DNA test like 23andMe, experts say you shouldn't assume you  | <a href="https://www.businessinsider.com/privacy-security-risks-genetic-testing-23andme-ancestry-dna-2019-2#comments">https://www.businessinsider.com/privacy-security-risks-genetic-testing-23andme-ancestry-dna-2019-2#comments</a>                                                           | en | FALSE |                         | 18710  | Business Insider                                                                  | <a href="http://www.businessinsider.com">http://www.businessinsider.com</a>                       | Research    | 0 |
| 667558993  | 8/1/17 15:58   | Amazon Takes Privacy Stand by Slapping Down Blu for Sending Personal Data to China            | <a href="http://observer.com/2017/08/amazon-encrypts-blu-cubof/">http://observer.com/2017/08/amazon-encrypts-blu-cubof/</a>                                                                                                                                                                     | en | FALSE |                         | 1063   | Politicker NJ                                                                     | <a href="http://www.politickernj.com/">http://www.politickernj.com/</a>                           | Theoretical | 0 |
| 1050201241 | 8/1/17 15:58   | Amazon Takes Privacy Stand by Slapping Down Blu for Sending Personal Data to China            | <a href="http://observer.com/2017/08/amazon-encrypts-blu-cubof/">http://observer.com/2017/08/amazon-encrypts-blu-cubof/</a>                                                                                                                                                                     | en | FALSE |                         | 21091  | observer.com                                                                      | <a href="http://www.observet.com">http://www.observet.com</a>                                     | Theoretical | 0 |
| 607543662  | 4/11/17 10:20  | An Algorithm That Hides Your Online Tracks With Random Footsteps                              | <a href="http://feedproxy.google.com/~r/TheAtlantic/~3/2CQJLI_GMnCI/">http://feedproxy.google.com/~r/TheAtlantic/~3/2CQJLI_GMnCI/</a>                                                                                                                                                           | en | FALSE |                         | 1110   | Atlantic                                                                          | <a href="http://www.theatlantic.com/">http://www.theatlantic.com/</a>                             | Theoretical | 0 |
| 1347725158 | 7/24/19 14:56  | Anonymized data isn't actually keeping your identity anonymous, researchers find              | <a href="https://www.google.com/url?url=https://www.mic.com/anonymized-data-isnt-actually-keeping-your-identity-anonymous-research">https://www.google.com/url?url=https://www.mic.com/anonymized-data-isnt-actually-keeping-your-identity-anonymous-research</a>                               | en | FALSE |                         | 109076 | Mic                                                                               | <a href="http://www.mic.com/">http://www.mic.com/</a>                                             | Research    | 0 |
| 1941939256 | 5/25/21 14:12  | Best browser for privacy 2021: Secure your web browsing                                       | <a href="https://www.zdnet.com/article/best-browser-for-privacy/#tag=BSSbaff68">https://www.zdnet.com/article/best-browser-for-privacy/#tag=BSSbaff68</a>                                                                                                                                       | en | FALSE | privacy, computers an   | 39330  | zdnet                                                                             | <a href="http://news.zdnet.com/">http://news.zdnet.com/</a>                                       | Research    | 0 |
| 1578210059 | 4/12/20 9:00   | Big Data Could Undermine the Covid-19 Response                                                | <a href="https://www.wired.com/story/big-data-could-undermine-the-covid-19-response">https://www.wired.com/story/big-data-could-undermine-the-covid-19-response</a>                                                                                                                             | en | FALSE |                         | 39849  | wired                                                                             | <a href="http://www.wired.com/">http://www.wired.com/</a>                                         | Research    | 0 |
| 1605708376 | 5/13/20 7:02   | Big Tech offers a way to track COVID-19 with cell phones                                      | <a href="http://dallasposttrib.com/big-tech-offers-a-way-to-track-covid-19-with-cell-phones/">http://dallasposttrib.com/big-tech-offers-a-way-to-track-covid-19-with-cell-phones/</a>                                                                                                           | en | FALSE |                         | 104386 | Dallas Post Tribune   Serving the Blac                                            | <a href="http://www.dallasposttrib.com">http://www.dallasposttrib.com</a>                         | Theoretical | 0 |
| 919962666  | 7/3/18 15:53   | Blockchain and GDPR &mdash; Friendemies?                                                      | <a href="http://feeds.feedblitz.com/~556173446/0/jaw-legal-news/">http://feeds.feedblitz.com/~556173446/0/jaw-legal-news/</a>                                                                                                                                                                   | en | FALSE |                         | 112662 | thelegalintelligence.com                                                          | <a href="http://thelegalintelligence.com/">http://thelegalintelligence.com/</a>                   | Theoretical | 0 |
| 1996963197 | 7/21/21 12:57  | Catholic priest quits after "anonymized" data revealed alleged use of Grindr                  | <a href="https://arstechnica.com/?p=1781933">https://arstechnica.com/?p=1781933</a>                                                                                                                                                                                                             | en | FALSE | privacy, christians and | 18351  | arstechnica.com                                                                   | <a href="http://arstechnica.com">http://arstechnica.com</a>                                       | Case        | 1 |
| 521848552  | 10/5/16 2:29   | CloudFlare shows Tor users the way out of CAPTCHA hell                                        | <a href="http://go.theregister.com/feed/www.theregister.co.uk/2016/10/05/cloudflare_tor/">http://go.theregister.com/feed/www.theregister.co.uk/2016/10/05/cloudflare_tor/</a>                                                                                                                   | en | FALSE |                         | 5532   | The Register                                                                      | <a href="http://www.theregister.co.uk/">http://www.theregister.co.uk/</a>                         | Theoretical | 0 |
| 169242193  | 8/25/20 9:00   | Column: Billboards that follow you? It's not sci-fi. They're already here                     | <a href="http://feeds.latimes.com/~r/latimes-business/~3/4Y2XT172X/column-clear-channel-billboards-privacy">http://feeds.latimes.com/~r/latimes-business/~3/4Y2XT172X/column-clear-channel-billboards-privacy</a>                                                                               | en | FALSE |                         | 6      | LA Times                                                                          | <a href="http://www.latimes.com/">http://www.latimes.com/</a>                                     | Theoretical | 0 |
| 1692722643 | 8/25/20 16:44  | Column: Billboards that follow you? It's not sci-fi. They're already here [Los Angeles Times] | <a href="https://www.dailyrepublic.com/all-cases/wires/column-billboards-that-follow-you-its-not-sci-fi-theyre-already-here-los-angeles-times-2/">https://www.dailyrepublic.com/all-cases/wires/column-billboards-that-follow-you-its-not-sci-fi-theyre-already-here-los-angeles-times-2/</a>   | en | FALSE |                         | 27866  | Daily Republic   Solano County's Bre                                              | <a href="http://www.dailyrepublic.com/">http://www.dailyrepublic.com/</a>                         | Theoretical | 0 |
| 566164912  | 1/11/17 9:00   | Companies are making billions off your medical data — and you won't get a cent of it          | <a href="http://mic.com/articles/16505/companies-are-making-billions-off-your-medical-data-and-you-wont-get-a-cent-of-it">http://mic.com/articles/16505/companies-are-making-billions-off-your-medical-data-and-you-wont-get-a-cent-of-it</a>                                                   | en | FALSE |                         | 109076 | Mic                                                                               | <a href="http://www.mic.com/">http://www.mic.com/</a>                                             | Theoretical | 0 |
| 1218246824 | 3/8/19 10:13   | Connected Cars: Security And Privacy Are Both Trust Hurdles                                   | <a href="https://www.forbes.com/sites/youkarmarling/2019/03/08/connected-cars-security-and-privacy-are-both-trust-hurdles/">https://www.forbes.com/sites/youkarmarling/2019/03/08/connected-cars-security-and-privacy-are-both-trust-hurdles/</a>                                               | en | FALSE |                         | 1104   | Forbes                                                                            | <a href="http://www.forbes.com/">http://www.forbes.com/</a>                                       | Theoretical | 0 |
| 1908005910 | 4/20/21 20:01  | Conservatives Should Support the College Transparency Act                                     | <a href="https://townhall.com/columnists/jacobbbina/2021/04/21/college-transparency-act-n2588268">https://townhall.com/columnists/jacobbbina/2021/04/21/college-transparency-act-n2588268</a>                                                                                                   | en | FALSE |                         | 19763  | townhall.com                                                                      | <a href="http://townhall.com">http://townhall.com</a>                                             | Theoretical | 0 |
| 1545015146 | 3/11/20 10:50  | Coronavirus In Tennessee: Most Cases Are In Williamson County                                 | <a href="https://www.wkcfm.org/post/coronavirus-tennessee-most-cases-are-williamson-county">https://www.wkcfm.org/post/coronavirus-tennessee-most-cases-are-williamson-county</a>                                                                                                               | en | FALSE |                         | 90047  | wkcfm.org                                                                         | <a href="http://wkcfm.org/spider">http://wkcfm.org/spider</a>                                     | Theoretical | 0 |
| 1578239664 | 5/3/21 0:15    | Coronavirus tracing tech policy 'more significant' than the war on encryption                 | <a href="https://www.zdnet.com/article/coronavirus-tracing-tech-policy-more-significant-than-the-war-on-encryption/#tag=BSSbaff68">https://www.zdnet.com/article/coronavirus-tracing-tech-policy-more-significant-than-the-war-on-encryption/#tag=BSSbaff68</a>                                 | en | FALSE |                         | 39330  | zdnet                                                                             | <a href="http://news.zdnet.com/">http://news.zdnet.com/</a>                                       | Research    | 0 |
| 192034911  | 5/3/21 16:48   | Data Privacy And Cryptography Experts File Brief In Support Of Census Bureau                  | <a href="https://www.thestreet.com/press-releases/data-privacy-and-cryptography-experts-file-brief-in-support-of-census-bureau-15643134">https://www.thestreet.com/press-releases/data-privacy-and-cryptography-experts-file-brief-in-support-of-census-bureau-15643134</a>                     | en | FALSE |                         | 21619  | The Street                                                                        | <a href="http://www.thestreet.com">http://www.thestreet.com</a>                                   | Theoretical | 0 |
| 70579451   | 10/13/17 8:17  | Dear America, you can't steal a personality: GDPR godfather talks privacy with <i>El Reg</i>  | <a href="http://go.theregister.com/feed/www.theregister.co.uk/2017/10/13/jan_philip_albrecht_on_privacy/">http://go.theregister.com/feed/www.theregister.co.uk/2017/10/13/jan_philip_albrecht_on_privacy/</a>                                                                                   | en | FALSE |                         | 5532   | The Register                                                                      | <a href="http://www.theregister.co.uk/">http://www.theregister.co.uk/</a>                         | Theoretical | 0 |
| 1025509316 | 10/15/18 19:00 | DNA testing companies put everyone's privacy at risk                                          | <a href="https://www.salon.com/2018/10/15/dna-testing-companies-puts-everyones-privacy-at-risk/">https://www.salon.com/2018/10/15/dna-testing-companies-puts-everyones-privacy-at-risk/</a>                                                                                                     | en | FALSE |                         | 1757   | Salon                                                                             | <a href="http://www.salon.com/">http://www.salon.com/</a>                                         | Theoretical | 0 |
| 845646955  | 4/10/18 1:01   | Don't be so shocked at spies tracking your phone                                              | <a href="http://www.heraldtribune.com/opinion/2018/04/10/dont-be-so-shocked-at-spies-tracking-your-phone-7aeefedc-true">http://www.heraldtribune.com/opinion/2018/04/10/dont-be-so-shocked-at-spies-tracking-your-phone-7aeefedc-true</a>                                                       | en | FALSE |                         | 27089  | heraldtribune.com                                                                 | <a href="http://heraldtribune.com">http://heraldtribune.com</a>                                   | Research    | 0 |
| 1928396558 | 5/11/21 19:01  | Elderly caretech platform Birdie gets \$11.5M Series A led by Index                           | <a href="https://techcrunch.com/2021/05/11/elderly-caretech-platform-birdie-gets-11-5m-series-a-led-by-index/">https://techcrunch.com/2021/05/11/elderly-caretech-platform-birdie-gets-11-5m-series-a-led-by-index/</a>                                                                         | en | FALSE |                         | 4438   | TechCrunch                                                                        | <a href="http://techcrunch.com">http://techcrunch.com</a>                                         | Theoretical | 0 |
| 192843059  | 5/11/21 19:01  | Elderly caretech platform Birdie gets \$11.5M Series A led by Index                           | <a href="https://api.follow.it/track-cs-story-click/v1U5Z90A7Oy48DTAAe7PxyNjHkQyDAk7urIk-https%253A%252F%29Techcrunch.com%252F20">https://api.follow.it/track-cs-story-click/v1U5Z90A7Oy48DTAAe7PxyNjHkQyDAk7urIk-https%253A%252F%29Techcrunch.com%252F20</a>                                   | en | FALSE | finances                | 34587  | pasadenaindependent.com                                                           | <a href="http://www.pasadenaindependent.com#spider">http://www.pasadenaindependent.com#spider</a> | Theoretical | 0 |
| 192843068  | 5/11/21 19:01  | Elderly caretech platform Birdie gets \$11.5M Series A led by Index                           | <a href="https://api.follow.it/track-cs-story-click/v1U5Z90A7Oy48DTAAe7PxyNjHkQyDAk7urIk-https%253A%252F%29Techcrunch.com%252F20">https://api.follow.it/track-cs-story-click/v1U5Z90A7Oy48DTAAe7PxyNjHkQyDAk7urIk-https%253A%252F%29Techcrunch.com%252F20</a>                                   | en | FALSE | finances                | 131661 | morgannews.com                                                                    | <a href="http://morgannews.com/">http://morgannews.com/</a>                                       | Theoretical | 0 |
| 192843022  | 5/11/21 19:01  | Elderly caretech platform Birdie gets \$11.5M Series A led by Index                           | <a href="https://api.follow.it/track-cs-story-click/v1U5Z90A7Oy48DTAAe7PxyNjHkQyDAk7urIk-https%253A%252F%29Techcrunch.com%252F20">https://api.follow.it/track-cs-story-click/v1U5Z90A7Oy48DTAAe7PxyNjHkQyDAk7urIk-https%253A%252F%29Techcrunch.com%252F20</a>                                   | en | FALSE | finances                | 34586  | arcadiaweekly.com                                                                 | <a href="http://www.arcadiaweekly.com#spider">http://www.arcadiaweekly.com#spider</a>             | Theoretical | 0 |
| 192850244  | 5/11/21 19:01  | Elderly caretech platform Birdie gets \$11.5M Series A led by Index                           | <a href="https://api.follow.it/track-cs-story-click/v1U5Z90A7Oy48DTAAe7PxyNjHkQyDAk7urIk-https%253A%252F%29Techcrunch.com%252F20">https://api.follow.it/track-cs-story-click/v1U5Z90A7Oy48DTAAe7PxyNjHkQyDAk7urIk-https%253A%252F%29Techcrunch.com%252F20</a>                                   | en | FALSE | finances                | 31448  | monroviaweekly.com                                                                | <a href="http://www.monroviaweekly.com#spider">http://www.monroviaweekly.com#spider</a>           | Theoretical | 0 |
| 160027480  | 5/29/20 7:50   | Ethereum Significantly Less Private Than Bitcoin, New Research Shows                          | <a href="https://coindesk.com/news/ethereum-significantly-less-private-than-bitcoin-new-research-shows">https://coindesk.com/news/ethereum-significantly-less-private-than-bitcoin-new-research-shows</a>                                                                                       | en | FALSE |                         | 380949 | <a href="http://www.ct.com/news/advocates/">http://www.ct.com/news/advocates/</a> | Research                                                                                          | 0           |   |
| 84141929   | 4/5/18 16:52   | Facebook spoke with hospitals about matching health data to anonymized profiles               | <a href="https://www.theverge.com/2018/4/5/17203262/facebook-medical-data-sharing-plan-healthcare">https://www.theverge.com/2018/4/5/17203262/facebook-medical-data-sharing-plan-healthcare</a>                                                                                                 | en | FALSE |                         | 107634 | Verge                                                                             | <a href="http://theverge.com/">http://theverge.com/</a>                                           | Theoretical | 0 |
| 142043137  | 10/16/19 11:32 | Feds Torpedo Massive Dark Web Child Porn Site                                                 | <a href="https://www.thedailybeast.com/feds-take-down-welcome-to-video-a-massive-dark-web-child-porn-site?source=articles&amp;via=rs">https://www.thedailybeast.com/feds-take-down-welcome-to-video-a-massive-dark-web-child-porn-site?source=articles&amp;via=rs</a>                           | en | FALSE |                         | 1707   | Daily Beast                                                                       | <a href="http://www.thedailybeast.com/">http://www.thedailybeast.com/</a>                         | Case        | 0 |
| 61269989   | 4/21/17 13:53  | Form an orderly queue! Google wants your blood (and other bodily fluids). Oh and your med     | <a href="https://techcrunch.com/2017/04/21/form-an-orderly-queue-google-wants-your-blood-and-other-bodily-fluids-oh-and-your-medical-records-72ac">https://techcrunch.com/2017/04/21/form-an-orderly-queue-google-wants-your-blood-and-other-bodily-fluids-oh-and-your-medical-records-72ac</a> | en | FALSE |                         | 4438   | TechCrunch                                                                        | <a href="http://techcrunch.com">http://techcrunch.com</a>                                         | Theoretical | 0 |
| 92599247   | 7/12/18 5:10   | Fugitive Cop Says He's Behind the DNC Leaks. It's His Latest Hoax.                            | <a href="http://feedproxy.google.com/~r/thedailybeast/articles/~3/3pA8fBjRyglw5/ugitive-cop-says-hes-behind-the-dnc-leaks-its-his-latest-hoax">http://feedproxy.google.com/~r/thedailybeast/articles/~3/3pA8fBjRyglw5/ugitive-cop-says-hes-behind-the-dnc-leaks-its-his-latest-hoax</a>         | en | FALSE |                         | 1707   | Daily Beast                                                                       | <a href="http://www.thedailybeast.com/">http://www.thedailybeast.com/</a>                         | Case        | 1 |
| 1138797303 | 1/8/19 1:58    | FYI: Twitter's API still spews enough metadata to reveal exactly where you lived, worked      | <a href="http://go.theregister.com/feed/www.theregister.co.uk/2019/01/08/twitter_privacy_problems/">http://go.theregister.com/feed/www.theregister.co.uk/2019/01/08/twitter_privacy_problems/</a>                                                                                               | en | FALSE |                         | 5532   | The Register                                                                      | <a href="http://www.theregister.co.uk/">http://www.theregister.co.uk/</a>                         | Theoretical | 0 |
| 1434707219 | 11/1/19 19:03  | Google bought Fitbit. What does that mean for your data privacy?                              | <a href="https://www.cbs.org/newsbu/economy/making-sense/google-bought-fitbit-what-does-that-mean-for-your-data-privacy">https://www.cbs.org/newsbu/economy/making-sense/google-bought-fitbit-what-does-that-mean-for-your-data-privacy</a>                                                     | en | FALSE |                         | 271188 | PBS NewsHour                                                                      | <a href="http://www.cbs.org/newshour/">http://www.cbs.org/newshour/</a>                           | Theoretical | 0 |

|            |                |                                                                                              |                                                                                                                                                                                                                                                                                                                 |    |       |                         |        |                                     |                                                                                               |             |              |
|------------|----------------|----------------------------------------------------------------------------------------------|-----------------------------------------------------------------------------------------------------------------------------------------------------------------------------------------------------------------------------------------------------------------------------------------------------------------|----|-------|-------------------------|--------|-------------------------------------|-----------------------------------------------------------------------------------------------|-------------|--------------|
| 136684014  | 9/19/19 8:46   | Google completes controversial takeover of DeepMind Health                                   | <a href="https://techcrunch.com/2019/09/19/google-completes-controversial-takeover-of-deepmind-health/">https://techcrunch.com/2019/09/19/google-completes-controversial-takeover-of-deepmind-health/</a>                                                                                                       | en | FALSE |                         | 4438   | TechCrunch                          | <a href="http://techcrunch.com">http://techcrunch.com</a>                                     | Theoretical | 0            |
| 136654480  | 9/19/19 8:46   | Google completes controversial takeover of DeepMind Health                                   | <a href="https://www.specificfeeds.com/track-rss-story-click-ck3da_N6g8DaYs4MjM6Lk0Wkxnao1pP19:cnjYmpL8NBGn15ZvH0Njg8YgGFIVDu4M">https://www.specificfeeds.com/track-rss-story-click-ck3da_N6g8DaYs4MjM6Lk0Wkxnao1pP19:cnjYmpL8NBGn15ZvH0Njg8YgGFIVDu4M</a>                                                     | en | FALSE |                         | 131661 | morgannews.com                      | <a href="http://morgannews.com/">http://morgannews.com/</a>                                   | Theoretical | 0            |
| 138427432  | 9/5/19 15:21   | Google releases a free/open differential privacy library                                     | <a href="https://beingboingo.net/2019/09/05/cakeaim-walsh-reach.html">https://beingboingo.net/2019/09/05/cakeaim-walsh-reach.html</a>                                                                                                                                                                           | en | FALSE |                         | 663527 | San Antonio News                    | <a href="http://sanantonionews.com/">http://sanantonionews.com/</a>                           | Theoretical | 0            |
| 1177149981 | 1/28/19 8:05   | Google&#8217;s Sidewalk Labs Plans to Package and Sell Location Data on Millions of Cells    | <a href="https://theintercept.com/2019/01/28/google-alphabet-sidewalk-labs-replica-cellphone-data/">https://theintercept.com/2019/01/28/google-alphabet-sidewalk-labs-replica-cellphone-data/</a>                                                                                                               | en | FALSE |                         | 269138 | Intercept                           | <a href="https://theintercept.com/">https://theintercept.com/</a>                             | Theoretical | 0            |
| 893381376  | 6/5/18 8:44    | Healthcare Data As Property Can Change Everything                                            | <a href="https://www.forbes.com/sites/ohmista/2018/06/05/healthcare-data-as-property-can-change-everything/">https://www.forbes.com/sites/ohmista/2018/06/05/healthcare-data-as-property-can-change-everything/</a>                                                                                             | en | FALSE |                         | 1104   | Forbes                              | <a href="http://www.forbes.com/">http://www.forbes.com/</a>                                   | Theoretical | 0            |
| 197007825  | 6/23/21 14:22  | Hospitals are selling treasure troves of medical data – what could go wrong?                 | <a href="https://www.theverge.com/2021/6/23/22547397/medical-records-health-data-hospitals-research">https://www.theverge.com/2021/6/23/22547397/medical-records-health-data-hospitals-research</a>                                                                                                             | en | FALSE | privacy, computers an   | 107634 | Verge                               | <a href="http://theverge.com/">http://theverge.com/</a>                                       | Theoretical | 0            |
| 835400394  | 2/1/18 16:30   | How a fitness app revealed military secrets – and the new reality of data collection         | <a href="https://www.vox.com/technology/2018/2/1/16845120/strava-data-tracking-privacy-military-bases">https://www.vox.com/technology/2018/2/1/16845120/strava-data-tracking-privacy-military-bases</a>                                                                                                         | en | FALSE |                         | 104828 | Vox                                 | <a href="http://www.vox.com">http://www.vox.com</a>                                           | Theoretical | 0            |
| 608487443  | 4/13/17 1:03   | How social media data can improve people's lives - if used responsibly                       | <a href="http://theconversation.com/how-social-media-data-can-improve-peoples-lives-if-used-responsibly-75367">http://theconversation.com/how-social-media-data-can-improve-peoples-lives-if-used-responsibly-75367</a>                                                                                         | en | FALSE |                         | 54346  | Conversation                        | <a href="https://theconversation.com/us">https://theconversation.com/us</a>                   | Theoretical | 0            |
| 1959454011 | 6/13/21 1:00   | How your medical data can save lives   Letters                                               | <a href="https://www.theguardian.com/commentisfree/2021/jun/13/how-medical-data-can-save-lives-observer-letters">https://www.theguardian.com/commentisfree/2021/jun/13/how-medical-data-can-save-lives-observer-letters</a>                                                                                     | en | FALSE | medicine and health, c  | 1751   | Guardian US                         | <a href="https://www.theguardian.com/us">https://www.theguardian.com/us</a>                   | Theoretical | 0            |
| 129039270  | 5/22/19 13:50  | In less than one second, a malicious web-page can uniquely fingerprint an iPhone, Pixel 2 or | <a href="https://beingboingo.net/2019/05/22/unique-device-fingerprints.html">https://beingboingo.net/2019/05/22/unique-device-fingerprints.html</a>                                                                                                                                                             | en | FALSE |                         | 663527 | San Antonio News                    | <a href="http://sanantonionews.com/">http://sanantonionews.com/</a>                           | Research    | 0            |
| 1990117400 | 7/14/21 9:00   | Inside the Industry That Unmasks People At Scale                                             | <a href="https://www.vice.com/en_us/article/privacy/industry-unmasks-at-scale-mald-to-pil">https://www.vice.com/en_us/article/privacy/industry-unmasks-at-scale-mald-to-pil</a>                                                                                                                                 | en | FALSE | politics and governme   | 300613 | VICE                                | <a href="http://www.vice.com/en_us">http://www.vice.com/en_us</a>                             | Case        | 0 Reporting  |
| 1420463956 | 10/16/19 12:06 | IRS Followed Bitcoin Transactions, Resulting In Takedown Of The Largest Child Exploitation   | <a href="https://www.forbes.com/sites/allyshillipser/2019/10/16/irs-followed-bitcoin-transactions-resulting-in-takedown-of-the-largest-child-exploitation">https://www.forbes.com/sites/allyshillipser/2019/10/16/irs-followed-bitcoin-transactions-resulting-in-takedown-of-the-largest-child-exploitation</a> | en | FALSE |                         | 1104   | Forbes                              | <a href="http://www.forbes.com/">http://www.forbes.com/</a>                                   | Case        | 0 Reporting  |
| 1346576946 | 7/23/19 18:27  | It's not that hard to unmask real people in anonymous data, researchers warn – CNET          | <a href="https://www.cnet.com/news/its-not-that-hard-to-unmask-real-people-in-anonymous-data-researchers-warn/#tag-CAD328aac">https://www.cnet.com/news/its-not-that-hard-to-unmask-real-people-in-anonymous-data-researchers-warn/#tag-CAD328aac</a>                                                           | en | FALSE |                         | 4415   | CNET                                | <a href="http://cnet.com">http://cnet.com</a>                                                 | Research    | 0            |
| 1544234025 | 3/10/20 16:01  | Knox County health officials: We won't hide it if a coronavirus case is confirmed here       | <a href="http://safefeds.knoxnews.com/~8186568164/knoxville/home/-Knox-County-health-officials-We-wont-hide-it-if-a-coronavirus-case-is-confirmed">http://safefeds.knoxnews.com/~8186568164/knoxville/home/-Knox-County-health-officials-We-wont-hide-it-if-a-coronavirus-case-is-confirmed</a>                 | en | FALSE |                         | 89     | The Knoxville News Sentinel         | <a href="http://www.knoxnews.com/">http://www.knoxnews.com/</a>                               | Theoretical | 0            |
| 1544234643 | 3/10/20 16:01  | Knox County health officials: We won't hide it if a coronavirus case is confirmed here       | <a href="http://safefeds.knoxnews.com/~8186568164/knoxville/home/-Knox-County-health-officials-We-wont-hide-it-if-a-coronavirus-case-is-confirmed">http://safefeds.knoxnews.com/~8186568164/knoxville/home/-Knox-County-health-officials-We-wont-hide-it-if-a-coronavirus-case-is-confirmed</a>                 | en | FALSE |                         | 607964 | Shopper News                        | <a href="https://www.knoxnews.com/shopper-news/">https://www.knoxnews.com/shopper-news/</a>   | Theoretical | 0            |
| 1899711947 | 4/7/21 8:30    | LiveRamp Enters into Strategic Partnership with Google Cloud to Enable Identity in the Cloud | <a href="http://www.businesswire.com/news/home/20210407005290/en/LiveRamp-Enters-into-Strategic-Partnership-with-Google-Cloud-to-Enable-Ident">http://www.businesswire.com/news/home/20210407005290/en/LiveRamp-Enters-into-Strategic-Partnership-with-Google-Cloud-to-Enable-Ident</a>                         | en | FALSE |                         | 659485 | Western Edition                     | <a href="http://www.thewesternedition.com/">http://www.thewesternedition.com/</a>             | Theoretical | 0            |
| 1571477410 | 4/7/20 12:15   | Location Tracking to Fight Coronavirus is Dangerous and Possibly Pointless                   | <a href="https://gizmodo.com/location-tracking-to-fight-coronavirus-is-dangerous-and-184922873">https://gizmodo.com/location-tracking-to-fight-coronavirus-is-dangerous-and-184922873</a>                                                                                                                       | en | FALSE |                         | 4469   | Gizmodo                             | <a href="http://gizmodo.com">http://gizmodo.com</a>                                           | Theoretical | 0            |
| 1193138147 | 2/12/19 17:00  | Medical database privacy                                                                     | <a href="https://techcrunch.com/2019/02/12/medical-database-privacy/">https://techcrunch.com/2019/02/12/medical-database-privacy/</a>                                                                                                                                                                           | en | FALSE |                         | 4438   | TechCrunch                          | <a href="http://techcrunch.com">http://techcrunch.com</a>                                     | Research    | 0            |
| 1828210820 | 1/19/21 11:29  | Mirador Analytics Partners With Datavant To Create Step Change In Industry's Approach To     | <a href="https://www.thestreet.com/press-releases/mirador-analytics-partners-with-datavant-to-create-step-change-in-industry-s-approach-to-hiops-de">https://www.thestreet.com/press-releases/mirador-analytics-partners-with-datavant-to-create-step-change-in-industry-s-approach-to-hiops-de</a>             | en | FALSE |                         | 21619  | The Street                          | <a href="http://www.thestreet.com">http://www.thestreet.com</a>                               | Theoretical | 0            |
| 1590198004 | 4/27/20 9:53   | Mobile phone data is useful in coronavirus battle. But are people protected enough?          | <a href="https://theconversation.com/mobile-phone-data-is-useful-in-coronavirus-battle-but-are-people-protected-enough-138504">https://theconversation.com/mobile-phone-data-is-useful-in-coronavirus-battle-but-are-people-protected-enough-138504</a>                                                         | en | FALSE |                         | 54346  | Conversation                        | <a href="https://theconversation.com/us">https://theconversation.com/us</a>                   | Theoretical | 0            |
| 199208010  | 7/23/21 16:31  | Msgr. Burnil's Resignation and the Surveillance Age: 5 Points to Consider                    | <a href="http://feedproxy.google.com/~nYCRRegisterDailyBlog-3/oneTQ128oc/msgr-burnil-s-resignation-and-the-surveillance-age-5-points-to-consider">http://feedproxy.google.com/~nYCRRegisterDailyBlog-3/oneTQ128oc/msgr-burnil-s-resignation-and-the-surveillance-age-5-points-to-consider</a>                   | en | FALSE | homosexuality           | 23390  | National Catholic Register          | <a href="http://www.ncregister.com">http://www.ncregister.com</a>                             | Case        | 1 Catholic p |
| 2003217604 | 7/28/21 4:00   | New Catholic website &#039;The Pillar&#039; operates on shaky journalistic foundation        | <a href="https://www.ncronline.org/news/new-catholic-website-pillar-operates-shaky-journalistic-foundation">https://www.ncronline.org/news/new-catholic-website-pillar-operates-shaky-journalistic-foundation</a>                                                                                               | en | FALSE | homosexuality, ethics,  | 33885  | ncronline.org                       | <a href="http://ncronline.org/spider">http://ncronline.org/spider</a>                         | Case        | 1 Catholic p |
| 74834859   | 12/17/17 20:01 | No hack needed: Anonymisation beats with a dash of SQL                                       | <a href="http://go.theregister.com/feed/www.theregister.co.uk/2017/12/18/no_hack_needed_anonymisation_beaten_with_a_dash_of_sql/">http://go.theregister.com/feed/www.theregister.co.uk/2017/12/18/no_hack_needed_anonymisation_beaten_with_a_dash_of_sql/</a>                                                   | en | FALSE |                         | 5532   | The Register                        | <a href="http://www.theregister.co.uk/">http://www.theregister.co.uk/</a>                     | Research    | 0            |
| 1833435015 | 2/15/17 0:00   | Not Your Grandpa's Payphone   The Independent                                                | <a href="https://independent.org/2017/02/not-your-grandpas-payphone/">https://independent.org/2017/02/not-your-grandpas-payphone/</a>                                                                                                                                                                           | en | FALSE |                         | 74548  | Independent.org                     | <a href="http://www.independent.org/spider">http://www.independent.org/spider</a>             | Theoretical | 0            |
| 1466081445 | 12/21/19 13:00 | Opinion   Where Even the Children Are Being Tracked - The New York Times                     | <a href="https://www.nytimes.com/interactive/2019/12/21/opinion/pasadena-smartphone-spying.html">https://www.nytimes.com/interactive/2019/12/21/opinion/pasadena-smartphone-spying.html</a>                                                                                                                     | en | FALSE |                         | 1      | New York Times                      | <a href="http://nytimes.com">http://nytimes.com</a>                                           | Case        | 1 NYT inves  |
| 1962416424 | 6/16/21 1:38   | Patient privacy in the big data era - Boston Children's Answers                              | <a href="https://answers.childrenshospital.org/patient-privacy-big-data/">https://answers.childrenshospital.org/patient-privacy-big-data/</a>                                                                                                                                                                   | en | FALSE | privacy, tests and test | 658824 | State News - United States - Massac | <a href="http://www.massachusetts.statenews.net/">http://www.massachusetts.statenews.net/</a> | Theoretical | 0            |
| 1558359077 | 3/25/20 5:31   | Privacy And Data Innovation Professionals Discuss Future Of Personal Marketing               | <a href="https://www.thestreet.com/press-releases/privacy-and-data-innovation-professionals-discuss-future-of-personal-marketing-15274852">https://www.thestreet.com/press-releases/privacy-and-data-innovation-professionals-discuss-future-of-personal-marketing-15274852</a>                                 | en | FALSE |                         | 21619  | The Street                          | <a href="http://www.thestreet.com">http://www.thestreet.com</a>                               | Theoretical | 0            |
| 884890903  | 11/17/17 0:00  | Privacy breaches in University file system affect 200 people                                 | <a href="https://www.starfordaily.com/2017/11/17/privacy-breaches-in-university-file-system-affect-200-people/">https://www.starfordaily.com/2017/11/17/privacy-breaches-in-university-file-system-affect-200-people/</a>                                                                                       | en | FALSE |                         | 30255  | Starford Daily                      | <a href="http://www.starfordaily.com/spider">http://www.starfordaily.com/spider</a>           | Case        | 0            |
| 1685334845 | 8/17/20 7:00   | Privacy Issues Still At Play With Many Contact-Tracing Tools                                 | <a href="https://www.forbes.com/sites/forbestechcouncil/2020/08/17/privacy-issues-still-at-play-with-many-contact-tracing-tools/">https://www.forbes.com/sites/forbestechcouncil/2020/08/17/privacy-issues-still-at-play-with-many-contact-tracing-tools/</a>                                                   | en | FALSE |                         | 1104   | Forbes                              | <a href="http://www.forbes.com/">http://www.forbes.com/</a>                                   | Research    | 0            |
| 1367291490 | 8/17/19 9:00   | Privacy researchers devise a noise-exploitation attack that defeats dynamic anonymity        | <a href="https://techcrunch.com/2019/08/17/privacy-researchers-devise-a-noise-exploitation-attack-that-defeats-dynamic-anonymity/">https://techcrunch.com/2019/08/17/privacy-researchers-devise-a-noise-exploitation-attack-that-defeats-dynamic-anonymity/</a>                                                 | en | FALSE |                         | 4438   | TechCrunch                          | <a href="http://techcrunch.com">http://techcrunch.com</a>                                     | Research    | 0            |
| 667554455  | 8/17/19 15:39  | Private Browsing Really Anonymous? Incognito Mode Histories Exposed By Researchers' Fe       | <a href="http://www.ibtimes.com/private-browsing-really-anonymous-incognito-mode-histories-exposed-researchers-fake-2573095">http://www.ibtimes.com/private-browsing-really-anonymous-incognito-mode-histories-exposed-researchers-fake-2573095</a>                                                             | en | FALSE |                         | 41550  | IBTimes                             | <a href="http://www.ibtimes.com/">http://www.ibtimes.com/</a>                                 | Case        | 0            |
| 1968615518 | 6/22/21 9:15   | Prognosis Health And Mirador Analytics Form Strategic Partnership To Streamline Expert Det   | <a href="https://www.thestreet.com/press-releases/prognosis-health-and-mirador-analytics-form-strategic-partnership-to-streamline-expert-determina">https://www.thestreet.com/press-releases/prognosis-health-and-mirador-analytics-form-strategic-partnership-to-streamline-expert-determina</a>               | en | FALSE | privacy, tests and test | 21619  | The Street                          | <a href="http://www.thestreet.com">http://www.thestreet.com</a>                               | Theoretical | 0            |
| 1711198218 | 9/14/20 16:52  | Race-based COVID-19 data may be used to discriminate against racialized communities          | <a href="https://theconversation.com/race-based-covid-19-data-may-be-used-to-discriminate-against-racialized-communities-198372">https://theconversation.com/race-based-covid-19-data-may-be-used-to-discriminate-against-racialized-communities-198372</a>                                                     | en | FALSE |                         | 54346  | Conversation                        | <a href="https://theconversation.com/us">https://theconversation.com/us</a>                   | Theoretical | 0            |
| 1272335723 | 5/23/19 13:06  | Report: Apps to Help Fight Depression and Quit Smoking Sell User Data to Facebook, Goog      | <a href="http://feedproxy.google.com/~vBreitbart/-3YWOK0BabTV/">http://feedproxy.google.com/~vBreitbart/-3YWOK0BabTV/</a>                                                                                                                                                                                       | en | FALSE |                         | 658995 | Breitbart - United States - Texas   | <a href="http://www.breitbart.com/texas/">http://www.breitbart.com/texas/</a>                 | Theoretical | 0            |
| 1272332520 | 5/23/19 13:06  | Report: Apps to Help Fight Depression and Quit Smoking Sell User Data to Facebook, Goog      | <a href="http://feedproxy.google.com/~vBreitbart/-3YWOK0BabTV/">http://feedproxy.google.com/~vBreitbart/-3YWOK0BabTV/</a>                                                                                                                                                                                       | en | FALSE |                         | 19334  | Breitbart                           | <a href="http://www.breitbart.com">http://www.breitbart.com</a>                               | Theoretical | 0            |
| 1346450032 | 7/23/19 11:44  | Researchers Reveal That Anonymized Data Is Easy To Reverse Engineer                          | <a href="https://gizmodo.com/researchers-reveal-that-anonymized-data-is-easy-to-reve-1836629166">https://gizmodo.com/researchers-reveal-that-anonymized-data-is-easy-to-reve-1836629166</a>                                                                                                                     | en | FALSE |                         | 4469   | Gizmodo                             | <a href="http://gizmodo.com">http://gizmodo.com</a>                                           | Research    | 0            |
| 1347024673 | 7/24/19 6:30   | Researchers spotlight the lie of &#8216;anonymous&#8217; data                                | <a href="https://techcrunch.com/2019/07/24/researchers-spotlight-the-lie-of-anonymous-data/">https://techcrunch.com/2019/07/24/researchers-spotlight-the-lie-of-anonymous-data/</a>                                                                                                                             | en | FALSE |                         | 4438   | TechCrunch                          | <a href="http://techcrunch.com">http://techcrunch.com</a>                                     | Research    | 0            |
| 1382879071 | 9/4/19 10:06   | Researchers Use Big Data And AI To Remove Legal Confidentiality                              | <a href="https://www.forbes.com/sites/simonhandley/2019/09/04/researchers-use-big-data-and-ai-to-remove-legal-confidentiality/">https://www.forbes.com/sites/simonhandley/2019/09/04/researchers-use-big-data-and-ai-to-remove-legal-confidentiality/</a>                                                       | en | FALSE |                         | 1104   | Forbes                              | <a href="http://www.forbes.com/">http://www.forbes.com/</a>                                   | Research    | 0            |

|            |               |                                                                                             |                                                                                                                                                                                                                                                                                                           |    |       |                        |        |                                      |                                                                                                                     |             |             |
|------------|---------------|---------------------------------------------------------------------------------------------|-----------------------------------------------------------------------------------------------------------------------------------------------------------------------------------------------------------------------------------------------------------------------------------------------------------|----|-------|------------------------|--------|--------------------------------------|---------------------------------------------------------------------------------------------------------------------|-------------|-------------|
| 1234103437 | 3/27/19 13:16 | Rethinking Privacy For The AI Era                                                           | <a href="https://www.forbes.com/sites/insights-intels/2019/03/27/rethinking-privacy-for-the-ai-era/">https://www.forbes.com/sites/insights-intels/2019/03/27/rethinking-privacy-for-the-ai-era/</a>                                                                                                       | en | FALSE |                        | 1104   | Forbes                               | <a href="http://www.forbes.com/">http://www.forbes.com/</a>                                                         | Theoretical | 0           |
| 1591779434 | 3/9/20 0:00   | Say Hello to Your 1.23-Ounce Big Brother: Fibrits Could Be Used to Track Viruses Like Covid | <a href="https://nimedia.com/news-and-politics/baiba-bolyard/2020/03/09/your-fibrit-could-be-used-to-monitor-the-spread-of-coronavirus-is-that-really/">https://nimedia.com/news-and-politics/baiba-bolyard/2020/03/09/your-fibrit-could-be-used-to-monitor-the-spread-of-coronavirus-is-that-really/</a> | en | FALSE |                        | 19082  | PJ Media                             | <a href="http://nimedia.com">http://nimedia.com</a>                                                                 | Theoretical | 0           |
| 863269194  | 5/1/18 8:30   | Scott Pruitt's new 'secret science' proposal is the wrong way to increase transparency      | <a href="https://www.theverge.com/2018/5/1/17204298/epa-science-transparency-rule-scott-pruitt-data-sharing">https://www.theverge.com/2018/5/1/17204298/epa-science-transparency-rule-scott-pruitt-data-sharing</a>                                                                                       | en | FALSE |                        | 107634 | Verge                                | <a href="http://theverge.com/">http://theverge.com/</a>                                                             | Theoretical | 0           |
| 1592515239 | 4/29/20 12:12 | Security experts warn: Don't let contact-tracing app lead to surveillance                   | <a href="https://www.zdnet.com/article/security-experts-warn-dont-let-contact-tracing-app-lead-to-surveillance/#tag-RSSbaftf68">https://www.zdnet.com/article/security-experts-warn-dont-let-contact-tracing-app-lead-to-surveillance/#tag-RSSbaftf68</a>                                                 | en | FALSE |                        | 39330  | zdnet                                | <a href="http://news.zdnet.com/">http://news.zdnet.com/</a>                                                         | Theoretical | 0           |
| 1659155022 | 5/7/20 11:55  | Security experts warn: Don't let contact-tracing app lead to surveillance   ZDNet           | <a href="https://www.zdnet.com/article/security-experts-warn-dont-let-contact-tracing-app-lead-to-surveillance/?tag-COS-05-10aaa0&amp;utm_campaign=">https://www.zdnet.com/article/security-experts-warn-dont-let-contact-tracing-app-lead-to-surveillance/?tag-COS-05-10aaa0&amp;utm_campaign=</a>       | en | FALSE |                        | 39330  | zdnet                                | <a href="http://news.zdnet.com/">http://news.zdnet.com/</a>                                                         | Theoretical | 0           |
| 1648691292 | 7/1/20 5:00   | Smart cities will track our every move. We will need to keep them in check                  | <a href="https://www.zdnet.com/article/smart-cities-will-track-our-every-move-we-will-need-to-keep-them-in-check/#tag-RSSbaftf68">https://www.zdnet.com/article/smart-cities-will-track-our-every-move-we-will-need-to-keep-them-in-check/#tag-RSSbaftf68</a>                                             | en | FALSE |                        | 39330  | zdnet                                | <a href="http://news.zdnet.com/">http://news.zdnet.com/</a>                                                         | Theoretical | 0           |
| 1263894329 | 4/22/19 14:02 | Smoking and depression apps are selling your data to Google and Facebook, study finds       | <a href="https://www.washingtonpost.com/business/smoking-and-depression-apps-are-selling-your-data-to-google-and-facebook-study-finds/2019/04/22/">https://www.washingtonpost.com/business/smoking-and-depression-apps-are-selling-your-data-to-google-and-facebook-study-finds/2019/04/22/</a>           | en | FALSE |                        | 2      | Washington Post                      | <a href="http://washingtonpost.com">http://washingtonpost.com</a>                                                   | Theoretical | 0           |
| 1269216050 | 4/29/19 8:00  | Smoking, depression apps sell your data to Google and Facebook, study finds                 | <a href="https://www.denverpost.com/2019/04/29/smoking-depression-apps-data-google-facebook/">https://www.denverpost.com/2019/04/29/smoking-depression-apps-data-google-facebook/</a>                                                                                                                     | en | FALSE |                        | 390346 | Latest news, sports, weather from De | <a href="http://feeds.denverpost.com/dp-news-breaking">http://feeds.denverpost.com/dp-news-breaking</a>             | Theoretical | 0           |
| 2017260233 | 8/12/21 5:50  | States Are Suing the Census Bureau Over Its Attempts to Make Data More Private              | <a href="https://slate.com/technology/2021/08/census-bureau-differential-privacy-lawsuit.html?ia=rs">https://slate.com/technology/2021/08/census-bureau-differential-privacy-lawsuit.html?ia=rs</a>                                                                                                       | en | FALSE | privacy, crime and cri | 19643  | Slate.com                            | <a href="http://www.slate.com">http://www.slate.com</a>                                                             | Research    | 0           |
| 689561246  | 9/4/17 0:00   | Study finds new way genome privacy can be breached                                          | <a href="http://www.sandiegouniontribune.com/business/itech/ed-me-privacy-genomes-20170901-story.html">http://www.sandiegouniontribune.com/business/itech/ed-me-privacy-genomes-20170901-story.html</a>                                                                                                   | en | FALSE |                        | 268225 | San Diego Union Tribune              | <a href="http://sandiegouniontribune.com/">http://sandiegouniontribune.com/</a>                                     | Research    | 0           |
| 1279342126 | 5/10/19 9:10  | The battle over Trump's tax returns, explained                                              | <a href="https://www.vox.com/policy-and-politics/2019/5/10/18537828/trump-tax-returns-congress-ins">https://www.vox.com/policy-and-politics/2019/5/10/18537828/trump-tax-returns-congress-ins</a>                                                                                                         | en | FALSE |                        | 104828 | Vox                                  | <a href="http://www.vox.com">http://www.vox.com</a>                                                                 | Case        | 1 Trump tax |
| 959881866  | 6/21/18 12:46 | The company that analyzed your DNA just sold the results to someone else. Really, what are  | <a href="http://www.ksl.com/ed_logger/ed_logger.php?location=https://www.deseretnews.com/article/900028783/the-company-that-analyzed-your-dna">http://www.ksl.com/ed_logger/ed_logger.php?location=https://www.deseretnews.com/article/900028783/the-company-that-analyzed-your-dna</a>                   | en | FALSE |                        | 69357  | ksl.com                              | <a href="http://www.ksl.com/#spider">http://www.ksl.com/#spider</a>                                                 | Theoretical | 0           |
| 1506029382 | 1/27/20 11:04 | The cost of Avast's Free Antivirus: Companies can spy on your clicks                        | <a href="http://feeds.mashable.com/~r/Mashable/~3/WJkEmWVYJL/">http://feeds.mashable.com/~r/Mashable/~3/WJkEmWVYJL/</a>                                                                                                                                                                                   | en | FALSE |                        | 5527   | Mashable!                            | <a href="http://mashable.com">http://mashable.com</a>                                                               | Theoretical | 0           |
| 522727935  | 10/6/16 19:38 | The FCC wants ISPs to get permission before sharing your data                               | <a href="https://www.engadget.com/2016/10/06/fcc-internet-privacy-data-rules-proposal-october/">https://www.engadget.com/2016/10/06/fcc-internet-privacy-data-rules-proposal-october/</a>                                                                                                                 | en | FALSE |                        | 41231  | engadget                             | <a href="http://www.engadget.com/">http://www.engadget.com/</a>                                                     | Theoretical | 0           |
| 1842776176 | 2/4/21 14:16  | The Genome You Sent to 23andMe Now Belongs to Richard Branson, Too                          | <a href="https://www.vice.com/en_us/article/ys8iq4/the-genome-you-sent-to-23andme-now-belongs-to-richard-branson-too">https://www.vice.com/en_us/article/ys8iq4/the-genome-you-sent-to-23andme-now-belongs-to-richard-branson-too</a>                                                                     | en | FALSE |                        | 300613 | VICE                                 | <a href="http://www.vice.com/en_us">http://www.vice.com/en_us</a>                                                   | Theoretical | 0           |
| 1004189485 | 1/14/17 5:00  | The Hidden Global Trade in Patient Medical Data   YaleGlobal Online                         | <a href="https://yaleglobal.yale.edu/content/hidden-global-trade-patient-medical-data?utm_source=L1etServe&amp;utm_campaign=079a8e34d-EMAIL_CAMPA">https://yaleglobal.yale.edu/content/hidden-global-trade-patient-medical-data?utm_source=L1etServe&amp;utm_campaign=079a8e34d-EMAIL_CAMPA</a>           | en | FALSE |                        | 32406  | Yale Global                          | <a href="http://yaleglobal.yale.edu/#spider">http://yaleglobal.yale.edu/#spider</a>                                 | Theoretical | 0           |
| 2025476014 | 8/25/21 6:57  | The secret bias hidden in mortgage-approval algorithms                                      | <a href="http://www.therepublic.com/2021/08/25/us-mortgage-approval-algorithms/">http://www.therepublic.com/2021/08/25/us-mortgage-approval-algorithms/</a>                                                                                                                                               | en | FALSE | finances, housing      | 21258  | m.therepublic.com                    | <a href="http://m.therepublic.com">http://m.therepublic.com</a>                                                     | Theoretical | 0           |
| 2025472059 | 8/25/21 6:57  | The secret bias hidden in mortgage-approval algorithms                                      | <a href="http://www.dailyjournal.net/2021/08/25/us-mortgage-approval-algorithms/">http://www.dailyjournal.net/2021/08/25/us-mortgage-approval-algorithms/</a>                                                                                                                                             | en | FALSE | finances, housing      | 74310  | dailyjournal.net                     | <a href="http://dailyjournal.net/#spider">http://dailyjournal.net/#spider</a>                                       | Theoretical | 0           |
| 2025470993 | 8/24/21 18:56 | The secret bias hidden in mortgage-approval algorithms                                      | <a href="https://mynorthwest.com/1107974/the-secret-bias-hidden-in-mortgage-approval-algorithms/">https://mynorthwest.com/1107974/the-secret-bias-hidden-in-mortgage-approval-algorithms/</a>                                                                                                             | en | FALSE | finances, housing      | 56743  | mynorthwest.com                      | <a href="http://mynorthwest.com/">http://mynorthwest.com/</a>                                                       | Theoretical | 0           |
| 2025462407 | 8/25/21 2:57  | The secret bias hidden in mortgage-approval algorithms                                      | <a href="http://www.mynews13.com/florlands/ap-online/2021/08/25/the-secret-bias-hidden-in-mortgage-approval-algorithms">http://www.mynews13.com/florlands/ap-online/2021/08/25/the-secret-bias-hidden-in-mortgage-approval-algorithms</a>                                                                 | en | FALSE | finances, housing      | 87980  | mynews13.com                         | <a href="http://www.mynews13.com/#spider">http://www.mynews13.com/#spider</a>                                       | Theoretical | 0           |
| 2025485120 | 8/25/21 2:57  | The secret bias hidden in mortgage-approval algorithms                                      | <a href="http://www.baynews9.com/flampage/ap-online/2021/08/25/the-secret-bias-hidden-in-mortgage-approval-algorithms">http://www.baynews9.com/flampage/ap-online/2021/08/25/the-secret-bias-hidden-in-mortgage-approval-algorithms</a>                                                                   | en | FALSE | finances, housing      | 25893  | baynews9.com                         | <a href="http://www.baynews9.com">http://www.baynews9.com</a>                                                       | Theoretical | 0           |
| 2025483454 | 8/25/21 6:56  | The secret bias hidden in mortgage-approval algorithms                                      | <a href="https://ktar.com/story/4652899/the-secret-bias-hidden-in-mortgage-approval-algorithms/">https://ktar.com/story/4652899/the-secret-bias-hidden-in-mortgage-approval-algorithms/</a>                                                                                                               | en | FALSE | finances, housing      | 25379  | ktar.com                             | <a href="http://ktar.com">http://ktar.com</a>                                                                       | Theoretical | 0           |
| 2025467857 | 8/25/21 6:57  | The secret bias hidden in mortgage-approval algorithms                                      | <a href="http://www.artesanews.com/2004852/the-secret-bias-hidden-in-mortgage-approval-algorithms.html">http://www.artesanews.com/2004852/the-secret-bias-hidden-in-mortgage-approval-algorithms.html</a>                                                                                                 | en | FALSE | housing                | 309726 | artesanews.com                       | <a href="http://artesanews.com/">http://artesanews.com/</a>                                                         | Theoretical | 0           |
| 2025502192 | 8/25/21 1:56  | The secret bias hidden in mortgage-approval algorithms                                      | <a href="https://www.marketbeat.com/articles/the-secret-bias-hidden-in-mortgage-approval-algorithms-2021-08-25/">https://www.marketbeat.com/articles/the-secret-bias-hidden-in-mortgage-approval-algorithms-2021-08-25/</a>                                                                               | en | FALSE | housing                | 660015 | Macon Daily                          | <a href="http://www.macondaily.com/">http://www.macondaily.com/</a>                                                 | Theoretical | 0           |
| 2025549044 | 8/25/21 9:25  | The secret bias hidden in mortgage-approval algorithms                                      | <a href="https://sentinelcolorado.com/news/nation-world/nation/the-secret-bias-hidden-in-mortgage-approval-algorithms/">https://sentinelcolorado.com/news/nation-world/nation/the-secret-bias-hidden-in-mortgage-approval-algorithms/</a>                                                                 | en | FALSE | finances, housing      | 87321  | aurorasentinel.com                   | <a href="http://www.aurorasentinel.com/#spider">http://www.aurorasentinel.com/#spider</a>                           | Theoretical | 0           |
| 2025597108 | 8/25/21 9:25  | The secret bias hidden in mortgage-approval algorithms                                      | <a href="https://sentinelcolorado.com/news/nation-world/nation/the-secret-bias-hidden-in-mortgage-approval-algorithms/">https://sentinelcolorado.com/news/nation-world/nation/the-secret-bias-hidden-in-mortgage-approval-algorithms/</a>                                                                 | en | FALSE | finances, housing      | 659573 | Aurora Magazine                      | <a href="http://www.aurorasentinel.com/aurora-magazine/">http://www.aurorasentinel.com/aurora-magazine/</a>         | Theoretical | 0           |
| 2025747972 | 8/25/21 12:03 | The secret bias hidden in mortgage-approval algorithms                                      | <a href="https://www.beaumontenterprise.com/news/article/The-secret-bias-hidden-in-mortgage-approval-16410286.php">https://www.beaumontenterprise.com/news/article/The-secret-bias-hidden-in-mortgage-approval-16410286.php</a>                                                                           | en | FALSE | finances, housing      | 663445 | Hardin County News                   | <a href="http://www.beaumontenterprise.com/hardincountynews">http://www.beaumontenterprise.com/hardincountynews</a> | Theoretical | 0           |
| 2025719392 | 8/25/21 12:03 | The secret bias hidden in mortgage-approval algorithms                                      | <a href="https://www.illtimes.com/business/nation/the-secret-bias-hidden-in-mortgage-approval-algorithms/article_0137bba6-a06f-5f73-a2c5-84071f4c">https://www.illtimes.com/business/nation/the-secret-bias-hidden-in-mortgage-approval-algorithms/article_0137bba6-a06f-5f73-a2c5-84071f4c</a>           | en | FALSE | finances, housing      | 28216  | Finger Lakes Times: Finger Lakes Tr  | <a href="http://www.illtimes.com/">http://www.illtimes.com/</a>                                                     | Theoretical | 0           |
| 2025667552 | 8/25/21 13:08 | The secret bias hidden in mortgage-approval algorithms                                      | <a href="http://www.winknews.com/2021/08/25/the-secret-bias-hidden-in-mortgage-approval-algorithms/">http://www.winknews.com/2021/08/25/the-secret-bias-hidden-in-mortgage-approval-algorithms/</a>                                                                                                       | en | TRUE  | finances, housing      | 80060  | winknews.com                         | <a href="http://www.winknews.com/#spider">http://www.winknews.com/#spider</a>                                       | Theoretical | 0           |
| 2025573414 | 8/25/21 6:56  | The secret bias hidden in mortgage-approval algorithms                                      | <a href="https://www.timesunion.com/business/article/The-secret-bias-hidden-in-mortgage-approval-16410286.php">https://www.timesunion.com/business/article/The-secret-bias-hidden-in-mortgage-approval-16410286.php</a>                                                                                   | en | FALSE | finances, housing      | 20821  | blog.timesunion.com                  | <a href="http://blog.timesunion.com">http://blog.timesunion.com</a>                                                 | Theoretical | 0           |
| 2025483191 | 8/25/21 6:56  | The secret bias hidden in mortgage-approval algorithms                                      | <a href="https://federalnewsradio.com/government-news/2021/08/the-secret-bias-hidden-in-mortgage-approval-algorithms/">https://federalnewsradio.com/government-news/2021/08/the-secret-bias-hidden-in-mortgage-approval-algorithms/</a>                                                                   | en | FALSE | finances, housing      | 22565  | federalnewsradio.com                 | <a href="http://www.federalnewsradio.com">http://www.federalnewsradio.com</a>                                       | Theoretical | 0           |
| 2025460910 | 8/25/21 6:57  | The secret bias hidden in mortgage-approval algorithms                                      | <a href="http://www.bcdemocrat.com/2021/08/25/us-mortgage-approval-algorithms/">http://www.bcdemocrat.com/2021/08/25/us-mortgage-approval-algorithms/</a>                                                                                                                                                 | en | FALSE | finances, housing      | 488106 | bcdemocrat.com                       | <a href="http://bcdemocrat.com/">http://bcdemocrat.com/</a>                                                         | Theoretical | 0           |
| 2025874110 | 8/25/21 12:30 | The Secret Bias Hidden in Mortgage-Approval Algorithms                                      | <a href="https://businessjournaldaily.com/the-secret-bias-hidden-in-mortgage-approval-algorithms/">https://businessjournaldaily.com/the-secret-bias-hidden-in-mortgage-approval-algorithms/</a>                                                                                                           | en | FALSE | housing                | 189893 | businessjournaldaily.com             | <a href="http://businessjournaldaily.com/">http://businessjournaldaily.com/</a>                                     | Theoretical | 0           |
| 2025848506 | 8/25/21 13:00 | The secret bias hidden in mortgage-approval algorithms                                      | <a href="https://decaturdailydemocrat.com/content/secret-bias-hidden-mortgage-approval-algorithms">https://decaturdailydemocrat.com/content/secret-bias-hidden-mortgage-approval-algorithms</a>                                                                                                           | en | FALSE | finances, housing, re  | 175953 | decaturdailydemocrat.com             | <a href="http://decaturdailydemocrat.com/">http://decaturdailydemocrat.com/</a>                                     | Theoretical | 0           |
| 2026047007 | 8/25/21 12:03 | The secret bias hidden in mortgage-approval algorithms                                      | <a href="https://www.dailyunion.com/news/nation_world/the-secret-bias-hidden-in-mortgage-approval-algorithms/article_fc691167-8b17-53bc-8176-abac">https://www.dailyunion.com/news/nation_world/the-secret-bias-hidden-in-mortgage-approval-algorithms/article_fc691167-8b17-53bc-8176-abac</a>           | en | FALSE | finances, housing      | 89063  | dailyunion.com                       | <a href="http://dailyunion.com/#spider">http://dailyunion.com/#spider</a>                                           | Theoretical | 0           |
| 2029009690 | 8/25/21 18:03 | The secret bias hidden in mortgage-approval algorithms                                      | <a href="https://www.beaumontenterprise.com/news/article/The-secret-bias-hidden-in-mortgage-approval-16410286.php">https://www.beaumontenterprise.com/news/article/The-secret-bias-hidden-in-mortgage-approval-16410286.php</a>                                                                           | en | FALSE | finances, housing      | 663403 | Jasper Newsboy                       | <a href="http://www.beaumontenterprise.com/jasper/">http://www.beaumontenterprise.com/jasper/</a>                   | Theoretical | 0           |
| 2025498728 | 8/25/21 6:56  | The secret bias hidden in mortgage-approval algorithms                                      | <a href="https://www.seattletimes.com/news/article/The-secret-bias-hidden-in-mortgage-approval-16410286.php">https://www.seattletimes.com/news/article/The-secret-bias-hidden-in-mortgage-approval-16410286.php</a>                                                                                       | en | FALSE | finances, housing      | 32770  | blog.seattletimes.com                | <a href="http://blog.seattletimes.com/#spider">http://blog.seattletimes.com/#spider</a>                             | Theoretical | 0           |
| 2025498642 | 8/25/21 7:13  | The secret bias hidden in mortgage-approval algorithms                                      | <a href="https://abcnews.go.com/Business/story/secret-bias-hidden-mortgage-approval-algorithms-79833917">https://abcnews.go.com/Business/story/secret-bias-hidden-mortgage-approval-algorithms-79833917</a>                                                                                               | en | FALSE | finances, housing      | 39000  | ABC News                             | <a href="http://abcnews.go.com/">http://abcnews.go.com/</a>                                                         | Theoretical | 0           |
| 2025597073 | 8/25/21 11:24 | The secret bias hidden in mortgage-approval algorithms                                      | <a href="https://nypost.com/2021/08/25/the-secret-bias-hidden-in-mortgage-approval-algorithms/">https://nypost.com/2021/08/25/the-secret-bias-hidden-in-mortgage-approval-algorithms/</a>                                                                                                                 | en | FALSE | finances, housing      | 7      | New York Post                        | <a href="http://www.nypost.com/">http://www.nypost.com/</a>                                                         | Theoretical | 0           |

|            |               |                                                                                            |                                                                                                                                                                                                                                                                                                                 |    |       |                        |        |                                      |                                                                                                     |             |   |
|------------|---------------|--------------------------------------------------------------------------------------------|-----------------------------------------------------------------------------------------------------------------------------------------------------------------------------------------------------------------------------------------------------------------------------------------------------------------|----|-------|------------------------|--------|--------------------------------------|-----------------------------------------------------------------------------------------------------|-------------|---|
| 1298379251 | 4/6/19 0:00   | The Secret Trust Scores Companies Use to Judge Us All                                      | <a href="https://www.wsj.com/articles/the-secret-trust-scores-companies-use-to-judge-us-all-11554529206">https://www.wsj.com/articles/the-secret-trust-scores-companies-use-to-judge-us-all-11554529206</a>                                                                                                     | en | FALSE |                        | 1150   | Wall Street Journal                  | <a href="https://www.wsj.com/">https://www.wsj.com/</a>                                             | Theoretical | 0 |
| 1205712854 | 2/23/19 10:00 | The Willow breast pump eases some of the worst parts of pumping, for a price               | <a href="http://feedproxy.google.com/~v/Mashable/~3/qst2ni4Ehlc/">http://feedproxy.google.com/~v/Mashable/~3/qst2ni4Ehlc/</a>                                                                                                                                                                                   | en | FALSE |                        | 5527   | Mashable!                            | <a href="http://mashable.com">http://mashable.com</a>                                               | Theoretical | 0 |
| 2026971591 | 8/27/21 5:00  | There Is Secret Bias Hidden in Mortgage-Approval Algorithms                                | <a href="https://www.omahadailyrecord.com/content/there-secret-bias-hidden-mortgage-approval-algorithms">https://www.omahadailyrecord.com/content/there-secret-bias-hidden-mortgage-approval-algorithms</a>                                                                                                     | en | TRUE  | finances, housing      | 661934 | Omaha Daily Record                   | <a href="http://www.omahadailyrecord.com/">http://www.omahadailyrecord.com/</a>                     | Theoretical | 0 |
| 1022274954 | 10/12/18 4:28 | There's a Good Chance Your Relatives' DNA is Online. That Means People Can Find You. To    | <a href="https://www.livescience.com/63818-easy-identify-people-genetic-databases.html">https://www.livescience.com/63818-easy-identify-people-genetic-databases.html</a>                                                                                                                                       | en | FALSE |                        | 20410  | livescience.com                      | <a href="http://www.livescience.com">http://www.livescience.com</a>                                 | Theoretical | 0 |
| 1364186991 | 8/13/19 13:53 | These dating apps were found to be leaking users' &#217; exact locations                   | <a href="https://www.dailymail.com/tech/dating-apps-leaking-users-exact-locations/">https://www.dailymail.com/tech/dating-apps-leaking-users-exact-locations/</a>                                                                                                                                               | en | FALSE |                        | 366828 | Daily Dot                            | <a href="http://dailymail.com/">http://dailymail.com/</a>                                           | Case        | 0 |
| 1844733400 | 2/6/21 14:34  | They Stormed the Capitol. Their Apps Tracked Them                                          | <a href="https://mobile.slashdot.org/story/21/02/06/0256208/they-stormed-the-capitol-their-apps-tracked-them?utm_source=rs1&amp;utm_medium=feed">https://mobile.slashdot.org/story/21/02/06/0256208/they-stormed-the-capitol-their-apps-tracked-them?utm_source=rs1&amp;utm_medium=feed</a>                     | en | FALSE |                        | 663527 | San Antonio News                     | <a href="http://sanantonionews.com/">http://sanantonionews.com/</a>                                 | Case        | 0 |
| 1830589306 | 1/21/21 22:38 | This Start-Up Founder Sees A Data Privacy Reckoning On The Horizon                         | <a href="https://www.forbes.com/sites/hesijones/2021/01/21/his-start-up-founder-sees-a-data-privacy-reckoning-on-the-horizon/">https://www.forbes.com/sites/hesijones/2021/01/21/his-start-up-founder-sees-a-data-privacy-reckoning-on-the-horizon/</a>                                                         | en | FALSE |                        | 1104   | Forbes                               | <a href="http://www.forbes.com/">http://www.forbes.com/</a>                                         | Theoretical | 0 |
| 1996938317 | 7/21/21 12:47 | Top Catholic priest resigns after phone data tracked to Grindr                             | <a href="https://nypost.com/2021/07/21/top-catholic-priest-resigns-after-phone-data-tracked-to-grindr/">https://nypost.com/2021/07/21/top-catholic-priest-resigns-after-phone-data-tracked-to-grindr/</a>                                                                                                       | en | FALSE | computers and the int  | 7      | New York Post                        | <a href="http://www.nypost.com/">http://www.nypost.com/</a>                                         | Case        | 1 |
| 1439120520 | 11/7/19 9:01  | TrialAssure Launches First-in-Class Document Anonymization Tool Using Machine Learning     | <a href="http://svdaily.com/trialassure-launches-first-in-class-document-anonymization-tool-using-machine-learning-and-artificial-intelligence-to-protect">http://svdaily.com/trialassure-launches-first-in-class-document-anonymization-tool-using-machine-learning-and-artificial-intelligence-to-protect</a> | en | FALSE |                        | 659489 | Silicon Valley Daily                 | <a href="http://www.svdaily.com/">http://www.svdaily.com/</a>                                       | Theoretical | 0 |
| 1512718472 | 2/4/20 2:01   | Twitter says a certain someone tried to discover the phone numbers used by potentially mil | <a href="https://go.theregister.co.uk/feed/www.theregister.co.uk/2020/02/04/twitter_phone_numbers/">https://go.theregister.co.uk/feed/www.theregister.co.uk/2020/02/04/twitter_phone_numbers/</a>                                                                                                               | en | FALSE |                        | 5532   | The Register                         | <a href="http://www.theregister.co.uk/">http://www.theregister.co.uk/</a>                           | Case        | 0 |
| 199809002  | 7/23/21 9:07  | UVM researchers create trend-prediction software                                           | <a href="https://www.wvax.com/2021/07/23/uvm-group-creates-twitter-prototype/">https://www.wvax.com/2021/07/23/uvm-group-creates-twitter-prototype/</a>                                                                                                                                                         | en | FALSE | computers and the int  | 69923  | wvax.com                             | <a href="http://www.wvax.com/#spider">http://www.wvax.com/#spider</a>                               | Theoretical | 0 |
| 1587047861 | 4/23/20 12:48 | UW releases coronavirus contact-tracing app                                                | <a href="http://safefeds.krem.com/~822245112/0/krem/news-1/UW-releases-coronavirus-contact-tracing-app">http://safefeds.krem.com/~822245112/0/krem/news-1/UW-releases-coronavirus-contact-tracing-app</a>                                                                                                       | en | FALSE |                        | 89905  | krem.com                             | <a href="http://www.krem.com/#spider">http://www.krem.com/#spider</a>                               | Theoretical | 0 |
| 1566803819 | 4/23/20 9:14  | UW, Microsoft release coronavirus contact-tracing app                                      | <a href="http://safefeds.king5.com/~822234249/king5/local-1/UW-Microsoft-release-coronavirus-contact-tracing-app">http://safefeds.king5.com/~822234249/king5/local-1/UW-Microsoft-release-coronavirus-contact-tracing-app</a>                                                                                   | en | FALSE |                        | 19647  | king5.com                            | <a href="http://www.king5.com">http://www.king5.com</a>                                             | Theoretical | 0 |
| 1543494240 | 3/9/20 21:21  | Vanderbilt student says he tested positive for coronavirus                                 | <a href="https://www.wsmv.com/news/vanderbilt-student-says-he-tested-positive-for-coronavirus/article_805abc70-826d-11ea-8407-677c6fa9acde.html">https://www.wsmv.com/news/vanderbilt-student-says-he-tested-positive-for-coronavirus/article_805abc70-826d-11ea-8407-677c6fa9acde.html</a>                     | en | FALSE |                        | 71152  | wsmv.com                             | <a href="http://www.wsmv.com/#spider">http://www.wsmv.com/#spider</a>                               | Theoretical | 0 |
| 1578452664 | 4/15/20 2:44  | Virus 'tracing' by smartphone: A key to reopening society?                                 | <a href="https://www.rawstory.com/2020/04/virus-tracing-by-smartphone-a-key-to-reopening-society/">https://www.rawstory.com/2020/04/virus-tracing-by-smartphone-a-key-to-reopening-society/</a>                                                                                                                 | en | FALSE |                        | 1127   | Raw Story                            | <a href="http://rawstory.com">http://rawstory.com</a>                                               | Theoretical | 0 |
| 57748997   | 2/7/17 2:30   | Vizio To Pay Millions After Secretly Spying On Customers, Selling Viewer Data              | <a href="http://bcovivkingnews.com/tech/vizio-to-pay-millions-after-secretly-spying-on-customers-selling-viewer-data/81073">http://bcovivkingnews.com/tech/vizio-to-pay-millions-after-secretly-spying-on-customers-selling-viewer-data/81073</a>                                                               | en | FALSE |                        | 28102  | Viking                               | <a href="http://bcovivking.com/">http://bcovivking.com/</a>                                         | Case        | 0 |
| 2017832561 | 8/12/21 18:00 | What exactly are Bitcoin Mixers?                                                           | <a href="https://www.eyonannapolis.net/2021/08/what-exactly-are-bitcoin-mixers/">https://www.eyonannapolis.net/2021/08/what-exactly-are-bitcoin-mixers/</a>                                                                                                                                                     | en | FALSE | privacy, computers an  | 661144 | Eye on Annapolis                     | <a href="http://www.eyonannapolis.net/">http://www.eyonannapolis.net/</a>                           | Theoretical | 0 |
| 1582076372 | 4/18/20 11:01 | What is contact tracing?                                                                   | <a href="https://techcrunch.com/2020/04/18/what-is-contact-tracing/">https://techcrunch.com/2020/04/18/what-is-contact-tracing/</a>                                                                                                                                                                             | en | FALSE |                        | 4438   | TechCrunch                           | <a href="http://techcrunch.com">http://techcrunch.com</a>                                           | Theoretical | 0 |
| 1582243434 | 4/18/20 11:01 | What is contact tracing?                                                                   | <a href="https://api.follow.it/track-rs-story-click/DQdp_N8p6AeXOL5mzAkoKzY1ESSB5v19-zryXmpj8_NjBGn1xZvd_98q38_AK3ISiMgJy_gDYkQ_JFY">https://api.follow.it/track-rs-story-click/DQdp_N8p6AeXOL5mzAkoKzY1ESSB5v19-zryXmpj8_NjBGn1xZvd_98q38_AK3ISiMgJy_gDYkQ_JFY</a>                                             | en | FALSE |                        | 31448  | monoviewweekly.com                   | <a href="http://www.monoviewweekly.com/#spider">http://www.monoviewweekly.com/#spider</a>           | Theoretical | 0 |
| 1582269713 | 4/18/20 11:01 | What is contact tracing?                                                                   | <a href="https://api.follow.it/track-rs-story-click/DQdp_N8p6AeXOL5mzAkoKzY1ESSB5v19-zryXmpj8_NjBGn1xZvd_98q38_AK3ISiMgJy_gDYkQ_JFY">https://api.follow.it/track-rs-story-click/DQdp_N8p6AeXOL5mzAkoKzY1ESSB5v19-zryXmpj8_NjBGn1xZvd_98q38_AK3ISiMgJy_gDYkQ_JFY</a>                                             | en | FALSE |                        | 34587  | pasadenaindependent.com              | <a href="http://www.pasadenaindependent.com/#spider">http://www.pasadenaindependent.com/#spider</a> | Theoretical | 0 |
| 1582269661 | 4/18/20 11:01 | What is contact tracing?                                                                   | <a href="https://api.follow.it/track-rs-story-click/DQdp_N8p6AeXOL5mzAkoKzY1ESSB5v19-zryXmpj8_NjBGn1xZvd_98q38_AK3ISiMgJy_gDYkQ_JFY">https://api.follow.it/track-rs-story-click/DQdp_N8p6AeXOL5mzAkoKzY1ESSB5v19-zryXmpj8_NjBGn1xZvd_98q38_AK3ISiMgJy_gDYkQ_JFY</a>                                             | en | FALSE |                        | 131661 | morgannews.com                       | <a href="http://morgannews.com/">http://morgannews.com/</a>                                         | Theoretical | 0 |
| 1368742296 | 8/19/19 12:32 | What New Methods Are Being Used To Protect User Data?                                      | <a href="https://www.forbes.com/sites/quora/2019/08/19/what-new-methods-are-being-used-to-protect-user-data/">https://www.forbes.com/sites/quora/2019/08/19/what-new-methods-are-being-used-to-protect-user-data/</a>                                                                                           | en | FALSE |                        | 1104   | Forbes                               | <a href="http://www.forbes.com/">http://www.forbes.com/</a>                                         | Research    | 0 |
| 1289580606 | 5/21/19 20:39 | What we know so far about Trump's tax returns, explained                                   | <a href="https://www.vox.com/2019/5/21/18634939/trump-tax-returns-irs-memo">https://www.vox.com/2019/5/21/18634939/trump-tax-returns-irs-memo</a>                                                                                                                                                               | en | FALSE |                        | 104828 | Vox                                  | <a href="http://www.vox.com">http://www.vox.com</a>                                                 | Case        | 1 |
| 1998645248 | 7/23/21 8:59  | When Catholic media meets tabloid aggressiveness, we all lose                              | <a href="https://angelusnews.com/news/when-catholic-media-meets-tabloid-aggressiveness-we-all-lose/">https://angelusnews.com/news/when-catholic-media-meets-tabloid-aggressiveness-we-all-lose/</a>                                                                                                             | en | FALSE | christians and christi | 194140 | angelusnews.com                      | <a href="http://angelusnews.com/">http://angelusnews.com/</a>                                       | Case        | 1 |
| 1576148269 | 4/12/20 7:26  | Will We Accept Being Monitored Via Our Smartphones As A Way Out Of The Pandemic, And       | <a href="https://www.forbes.com/sites/enriquez/2020/04/12/will-we-accept-being-monitored-via-our-smartphones-as-a-way-out-of-the-pandemic-an">https://www.forbes.com/sites/enriquez/2020/04/12/will-we-accept-being-monitored-via-our-smartphones-as-a-way-out-of-the-pandemic-an</a>                           | en | FALSE |                        | 1104   | Forbes                               | <a href="http://www.forbes.com/">http://www.forbes.com/</a>                                         | Theoretical | 0 |
| 1597371319 | 5/5/20 9:00   | Withings Lockdown Lowdown Study Shows People Are Not Gaining Weight Or Slowing Dow         | <a href="https://www.thestreet.com/press-releases/withings-lockdown-lowdown-study-shows-people-are-not-gaining-weight-or-slowing-down-during-de">https://www.thestreet.com/press-releases/withings-lockdown-lowdown-study-shows-people-are-not-gaining-weight-or-slowing-down-during-de</a>                     | en | FALSE |                        | 21619  | The Street                           | <a href="http://www.thestreet.com">http://www.thestreet.com</a>                                     | Theoretical | 0 |
| 583140439  | 2/16/17 10:27 | Would you share your personal tax data for a deal on a loan?                               | <a href="http://www.dailyherald.com/article/20170219/business/170219154/">http://www.dailyherald.com/article/20170219/business/170219154/</a>                                                                                                                                                                   | en | FALSE |                        | 104    | Daily Herald - Arlington Heights, IL | <a href="http://www.dailyherald.com/">http://www.dailyherald.com/</a>                               | Theoretical | 0 |
| 794062910  | 1/20/18 9:00  | WTF is GDPR?                                                                               | <a href="https://techcrunch.com/2018/01/20/wtf-is-gdpr/">https://techcrunch.com/2018/01/20/wtf-is-gdpr/</a>                                                                                                                                                                                                     | en | FALSE |                        | 4438   | TechCrunch                           | <a href="http://techcrunch.com">http://techcrunch.com</a>                                           | Case        | 0 |
| 981753253  | 9/10/18 16:51 | You Discovered Your Genetic History. Is It Worth The Privacy Risk?                         | <a href="http://fortune.com/2018/09/10/genetic-history-test-privacy-risk/">http://fortune.com/2018/09/10/genetic-history-test-privacy-risk/</a>                                                                                                                                                                 | en | FALSE |                        | 1105   | Fortune                              | <a href="http://fortune.com">http://fortune.com</a>                                                 | Theoretical | 0 |
| 1543022179 | 3/9/20 10:00  | Your Fitbit Could Be Used to Monitor the Spread of Coronavirus. Is That Really What We Wa  | <a href="https://pjmedia.com/trending/your-fitbit-could-be-used-to-monitor-the-spread-of-coronavirus-is-that-really-what-we-want/">https://pjmedia.com/trending/your-fitbit-could-be-used-to-monitor-the-spread-of-coronavirus-is-that-really-what-we-want/</a>                                                 | en | FALSE |                        | 19082  | PJ Media                             | <a href="http://pjmedia.com">http://pjmedia.com</a>                                                 | Theoretical | 0 |
| 1053423444 | 2/12/17 10:19 | Your Vizio TV was probably spying on you, says FTC                                         | <a href="http://www.krcr.com/article/your-vizio-tv-was-probably-spying-on-you-says-ftc-8734022">http://www.krcr.com/article/your-vizio-tv-was-probably-spying-on-you-says-ftc-8734022</a>                                                                                                                       | en | FALSE |                        | 29811  | krcr.com                             | <a href="http://www.krcr.com/#spider">http://www.krcr.com/#spider</a>                               | Case        | 0 |
| 1056897428 | 2/12/17 10:19 | Your Vizio TV was probably spying on you, says FTC                                         | <a href="http://www.kcci.com/article/your-vizio-tv-was-probably-spying-on-you-says-ftc-8734022">http://www.kcci.com/article/your-vizio-tv-was-probably-spying-on-you-says-ftc-8734022</a>                                                                                                                       | en | FALSE |                        | 21605  | kcci.com                             | <a href="http://www.kcci.com">http://www.kcci.com</a>                                               | Case        | 0 |
| 1049847304 | 2/12/17 10:19 | Your Vizio TV was probably spying on you, says FTC                                         | <a href="http://www.wlwt.com/article/your-vizio-tv-was-probably-spying-on-you-says-ftc-8734022">http://www.wlwt.com/article/your-vizio-tv-was-probably-spying-on-you-says-ftc-8734022</a>                                                                                                                       | en | FALSE |                        | 78560  | wlwt.com                             | <a href="http://www.wlwt.com/#spider">http://www.wlwt.com/#spider</a>                               | Case        | 0 |
