# Supplementary material for: Global healthcare fairness: We should be sharing more, not less, data
Source: PubMed Central journal article supplement (PMC9931202; doi:10.1371/journal.pdig.0000102), 2022-10-06
Supplement: pdig.0000102.s003.pdf [file pdig.0000102.s003.pdf]

## Complete List of individual cases on media about personal information disclosure

5 years, 09-01-2016 through 09-01-2021

| Characteristic                                                                                             | N = 23 <sup>1</sup> |
|------------------------------------------------------------------------------------------------------------|---------------------|
| title                                                                                                      |                     |
| A Catholic priest resigned after a news site used cell phone location data to track his phone              | 1 (4.3%)            |
| Catholic priest quits after "anonymized" data revealed alleged use of Grindr                               | 1 (4.3%)            |
| Feds Torpedo Massive Dark Web Child Porn Site                                                              | 1 (4.3%)            |
| Fugitive Cop Says He's Behind the DNC Leaks. It's His Latest Hoax.                                         | 1 (4.3%)            |
| Inside the Industry That Unmasks People At Scale                                                           | 1 (4.3%)            |
| IRS Followed Bitcoin Transactions, Resulting In Takedown Of The Largest Child Exploitation Site On The Web | 1 (4.3%)            |
| Msgr. Burrill's Resignation and the Surveillance Age: 5 Points to Consider                                 | 1 (4.3%)            |
| New Catholic website "The Pillar" operates on shaky journalistic foundation                                | 1 (4.3%)            |
| Opinion   Where Even the Children Are Being Tracked - The New York Times                                   | 1 (4.3%)            |
| Privacy breaches in University file system affect 200 people                                               | 1 (4.3%)            |
| Private Browsing Really Anonymous? Incognito Mode Histories Exposed By Researchers' Fake Company           | 1 (4.3%)            |
| The battle over Trump's tax returns, explained                                                             | 1 (4.3%)            |
| These dating apps were found to be leaking users' exact locations                                          | 1 (4.3%)            |
| They Stormed the Capitol. Their Apps Tracked Them                                                          | 1 (4.3%)            |
| Top Catholic priest resigns after phone data tracked to Grindr                                             | 1 (4.3%)            |
| Twitter says a certain someone tried to discover the phone numbers used by potentially millions of twits   | 1 (4.3%)            |
| Vizio To Pay Millions After Secretly Spying On Customers, Selling Viewer Data                              | 1 (4.3%)            |
| What we know so far about Trump's tax returns, explained                                                   | 1 (4.3%)            |
| When Catholic media meets tabloid aggressiveness, we all lose                                              | 1 (4.3%)            |
| WTF is GDPR?                                                                                               | 1 (4.3%)            |
| Your Vizio TV was probably spying on you, says FTC                                                         | 3 (13%)             |

<sup>1</sup> n (%)
